# Supplementary material for: Catalytic synthesis of renewable phenol derivatives from biobased furanic derivatives
Source: Royal Society of Chemistry journal article supplement (doi:10.1039/d3ra06461a), 2023-01-01
Supplement: d3ra06461a1.pdf [file d3ra06461a1.pdf]

## SUPPORTING INFORMATION

### Catalytic synthesis of renewable phenol derivatives from biobased furanic derivatives

Adrien Ratier, Richail D. Mouladou-Koumba, Mélanie Anizan, Sarah Behloul, Frédéric Guegan,\*  
Gilles Frapper, Quentin Blancart Remaury, Karine De Oliveira Vigier, Jianxia Zheng and François Jérôme\*

#### 1. Chemicals

Prior to use, furfural and furfuryl alcohol were purified following the guidelines of Armarego and Chai<sup>1</sup>. The reagents, catalysts and solvents used in this study are listed below. All of them were used as received from commercial suppliers (unless otherwise indicated).

**Table S1.** List, CAS number, suppliers and purity of reagents and catalysts used in this work

| Name                           | CAS number | Purity | Supplier       |
|--------------------------------|------------|--------|----------------|
| 2-Methyl furan                 | 534-22-5   | 99 %   | Sigma-Aldrich  |
| Furfural                       | 98-01-1    | 97 %   | Sigma-Aldrich  |
| Furfuryl alcohol               | 98-00-0    | 98%    | Sigma-Aldrich  |
| 5-Hydroxymethylfurfural        | 67-47-0    | 99%    | Sigma-Aldrich  |
| 2,5-Dimethyl furan             | 625-86-5   | 99%    | Acros Organics |
| Phenol                         | 108-95-2   | 99.5%  | Sigma-Aldrich  |
| Amberlyst-15                   | 9037-24-2  | -      | Acros Organics |
| Zinc chloride                  | 7646-85-7  | > 98%  | Alfa Aesar     |
| Zinc Iodide                    | 10139-47-6 | ≥ 98%  | Sigma Aldrich  |
| Copper Chloride                | 7447-39-4  | 99%    | Sigma Aldrich  |
| Tin(II) Chloride               | 7772-99-8  | 98%    | Sigma Aldrich  |
| Aluminium chloride             | 7646-70-0  | -      | Sigma Aldrich  |
| Copper oxide                   | 1317-38-0  | -      | Sigma Aldrich  |
| Triflic acid                   | 1493-13-6  | 98%    | Sigma Aldrich  |
| Isobutyric acid                | 107-92-6   | ≥ 99%  | Sigma Aldrich  |
| Acetic acid                    | 64-19-7    | 99%    | Sigma Aldrich  |
| Hexafluoroisopropanol          | 920-66-1   | ≥ 99%  | Sigma Aldrich  |
| 2-Methyltetrahydrofuran        | 96-47-6    | ≥ 99%  | Sigma Aldrich  |
| Ethylpropionate                | 623-47-2   | 99%    | Sigma-Aldrich  |
| Diethylacetylene dicarboxylate | 762-21-0   | 95%    | Sigma-Aldrich  |

**<sup>1</sup>H NMR and <sup>13</sup>C NMR** were recorded on a Bruker Ultrashield 500 plus (500MHz). All spectra were internally referenced to residual proton solvent signals. Data for <sup>1</sup>H NMR are reported as chemical shift ( $\delta$  ppm), multiplicity (s = singlet, d = doublet, t = triplet, q = quartet, quint = quintet, m = multiplet, br = broad signal), coupling constants (Hz), and integration. Data for <sup>13</sup>C NMR are reported as chemical shifts.

**Gas chromatography (GC) analysis:** Samples were prepared by picking up 100  $\mu$ L of the reaction medium, which was then diluted to 1 mL with isopropanol. Samples were analyzed on a Scion 436-GC equipped with a HP5MS column (30 m x 0.25 mm x 0.5 Micron, -60 to 325/350  $^{\circ}$ C) and using a flow front of 1 mL/min and a split ratio 60:1. The temperature at the injector was set at 270  $^{\circ}$ C and the injected volume was 5  $\mu$ L. Method starts at 40  $^{\circ}$ C for 1 min followed by an increment of 10  $^{\circ}$ C per minute up to 130  $^{\circ}$ C, then 4 min at this temperature followed by an increment of 20  $^{\circ}$ C per minute up to 250  $^{\circ}$ C and it finally stays at this temperature for 4 min.

**Gas chromatography-High Resolution Mass Spectrometry (GC-HRMS):** GC-HRMS was performed on a Gas Chromatograph (GC) Agilent 7890A coupled to a High-Resolution Mass Spectrometer (quadrupole - Time of flight - QToF HRMS ; Agilent 7200 accurate mass detector) equipped with an Electronic Ionization (EI) source. Products were separated on a HP5MS column (30 m x 0.25 mm x 0.5 Micron, -60 to 325/350  $^{\circ}$ C). Injector temperature was set at 270 $^{\circ}$ C with a split ratio 60:1. Septum purge flow and gas saver flow were 3 mL.min<sup>-1</sup> and 20 mL.min<sup>-1</sup>, respectively. Helium was used as the carrier gas with a flow rate of 1 mL.min<sup>-1</sup>. The oven temperature was held at 40 $^{\circ}$ C for 1 min, then increased by 10  $^{\circ}$ C.min<sup>-1</sup> to 130 $^{\circ}$ C and held for 2 min, and then by 15  $^{\circ}$ C.min<sup>-1</sup> to 300 $^{\circ}$ C and held for 10 min. The mass detector was at 250 $^{\circ}$ C and operated in scan mode, with electronic impact ionization (ionization energy 70 eV) and a mass range of 30 to 500 amu. A scan rate of 5 scans.s<sup>-1</sup> was used to detect the ions formed.

**Ultra High Performance Liquid Chromatography-High Resolution Mass Spectrometry (UHPLC-HRMS):** UHPLC-MS was performed on a Thermo scientific Ultimate 3000 coupled with a Bruker impact HD Series Quadrupole-Time of Flight (QTOF) MS equipped with an Electrospray (ESI) ion source. The LC column was a Hypersil GOLD 1.9  $\mu$ m, 50 x 2.1 mm, a flow of mobile phase of 0.4 mL min<sup>-1</sup> was used, and the temperature of the column was set at 30 $^{\circ}$ C. The mobile phase consisted in ultrapure water (eluent A) and acetonitrile (eluent B), both with 0.1 % of formic acid. After injection of 10  $\mu$ L of sample, the gradient started with 95% of B and was constant during 1 min. Then, it reached 99% of B in 11 min and was constant during 1 min. The column was then reconditioned for 2 min with 95 % of A before reuse. For the MS, the ESI source operated in positive polarity and its parameters were fixed as follows: gas temperature 200  $^{\circ}$ C; drying gas 8.0 L min<sup>-1</sup>; nebulizer 2.1 Bar, capillary 2500 V; the mass range was from 50 to 1000 m/z

## 2. Calibration curves

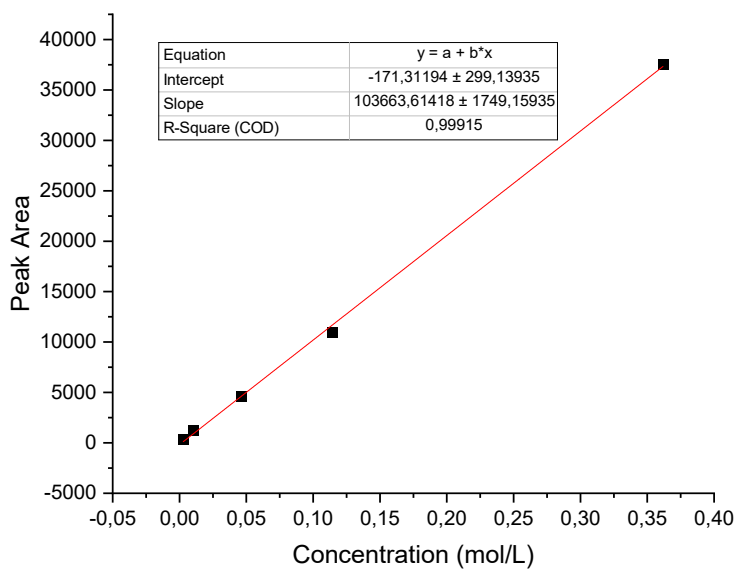

**Figure S1** Calibration curve of methylfuran

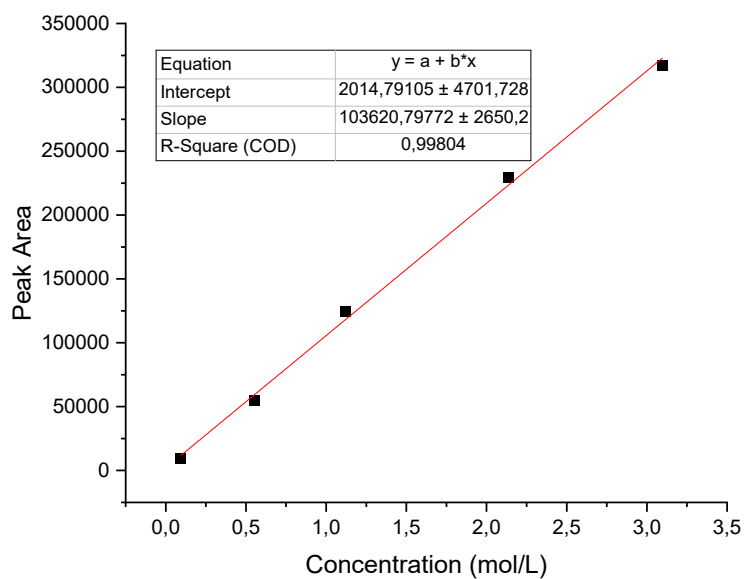

**Figure S2** Calibration curve of ethyl propiolate

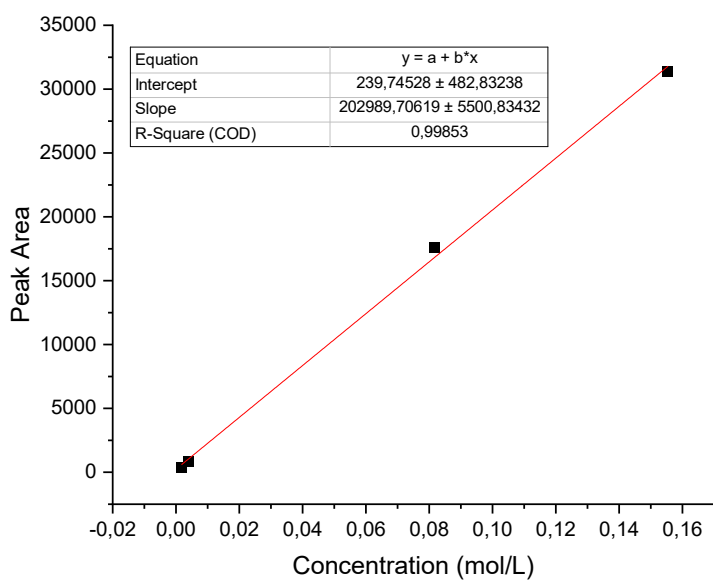

**Figure S3** Calibration curve of **1-o**

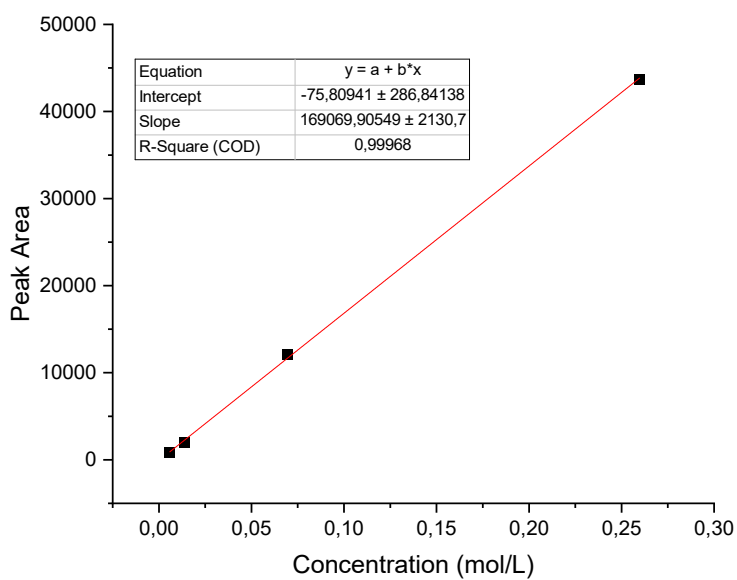

**Figure S4** Calibration curve of **1-m**

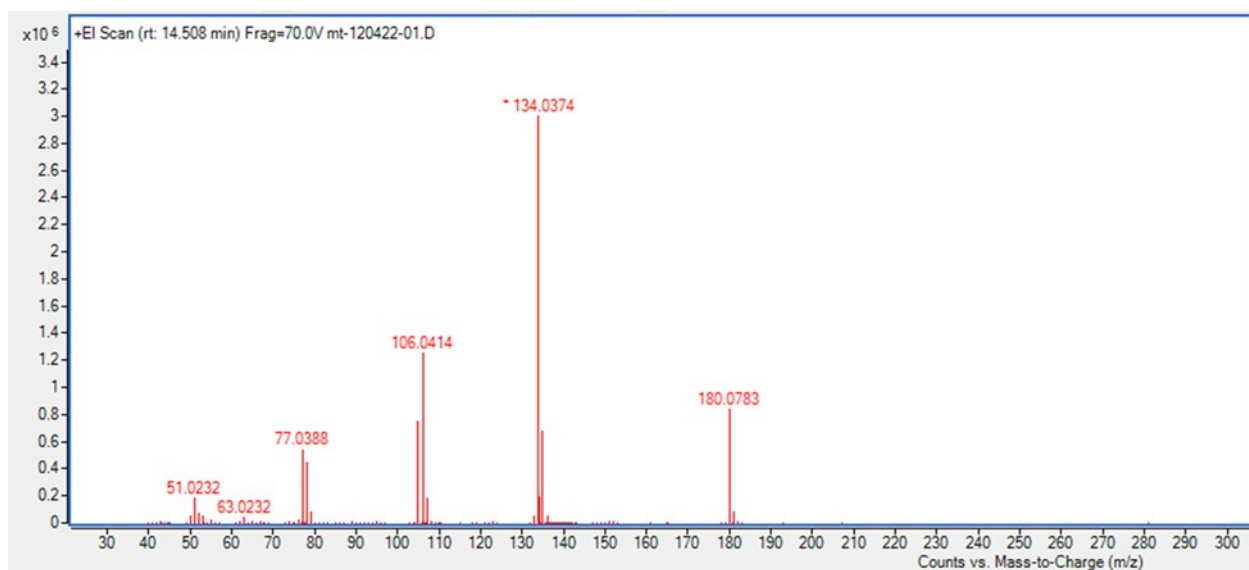

**Figure S5** High resolution mass spectra of the four products obtained by reaction of MF (1eq.) with EP (5eq.) in the presence of 15 mol% of ZnCl<sub>2</sub>

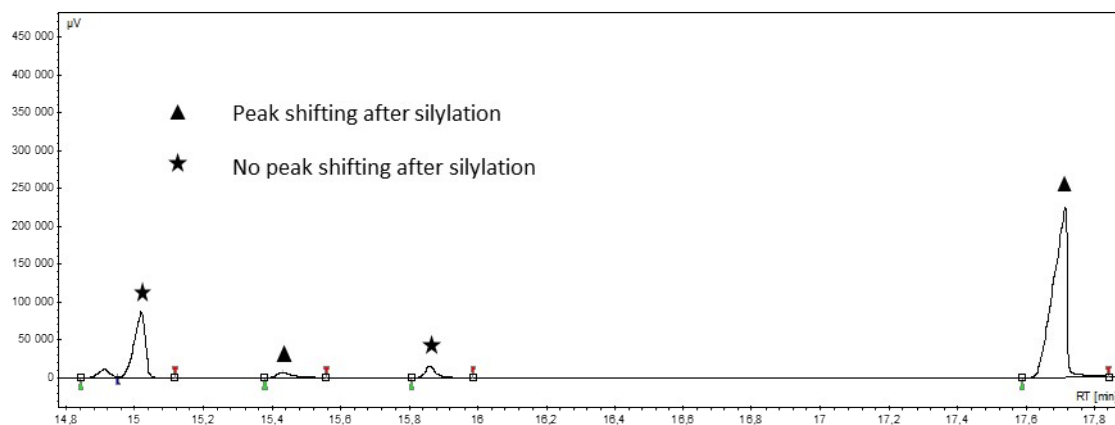

**Figure S6** GC profile and peak shifting after silylation of the four reactions products obtained by reaction of MF (1eq.) with EP (5eq.) in the presence of 15 mol% of  $\text{ZnCl}_2$

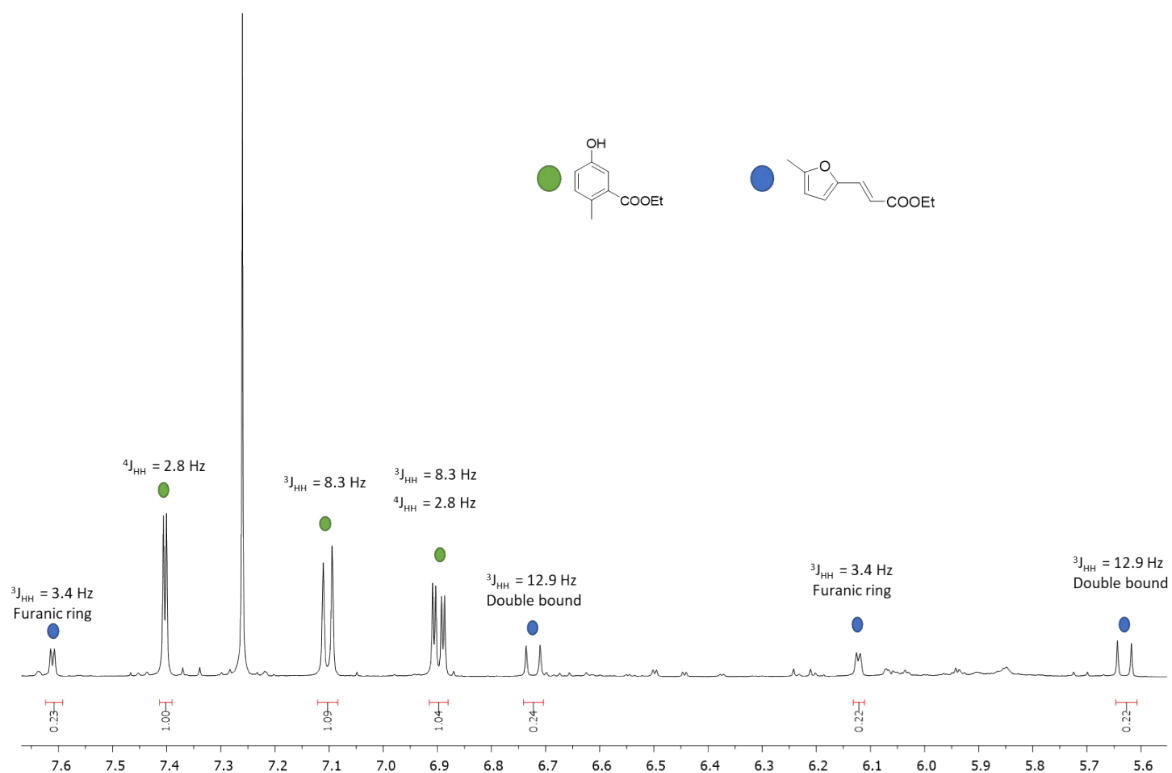

**Figure S7** <sup>1</sup>H NMR (in CDCl<sub>3</sub>)-zoom on the aromatic region of the crude mixture containing the phenol **1** and the alkylated products **2** (*trans* isomer)

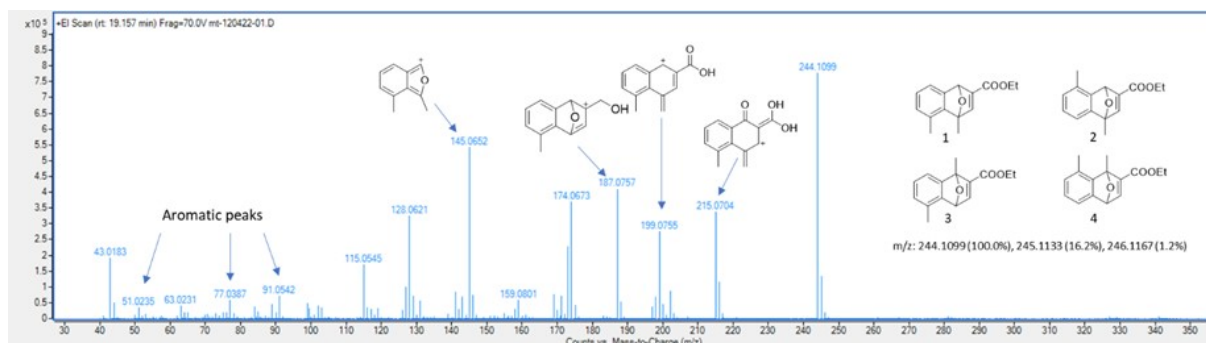

**Figure S8** Mass spectrum showing the occurrence of successive Diels Alder reaction between methyl furan and ethyl propiolate and the associated fragments

Note 1: Four structures may correspond to the molecular formula.

Note 2: Fragments were calculated using Mass Frontier<sup>TM</sup> 8.0 from ethyl 4,5-dimethyl-1,4-dihydro-1,4-epoxynaphthal-ene-2-carboxylate (1).

Note 3: Analysis of mass fragments proved that the ester moiety is grafted on the non-aromatic part.



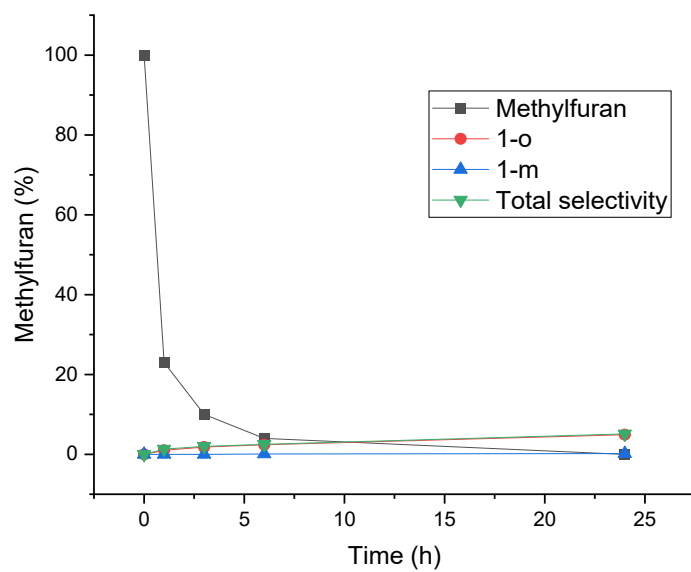

**Figure S9** Plot of the MF conversion and phenol yields as a function of the reaction time (MF (1eq.), EP (5eq.), Amberlyst-15 (15 mol% of H<sup>+</sup>) and 100°C).

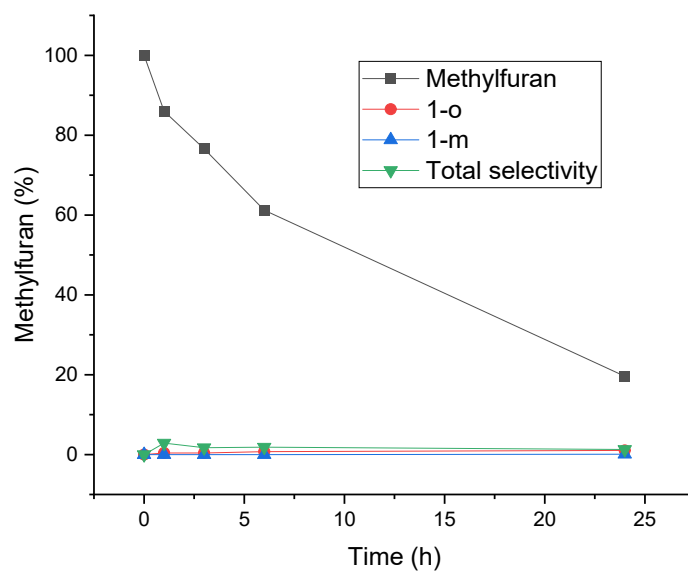

**Figure S10** Plot of the MF conversion and phenol yields as a function of the reaction time (MF (1eq.), EP (5eq.), acetic acid (15 mol%) and 100°C).

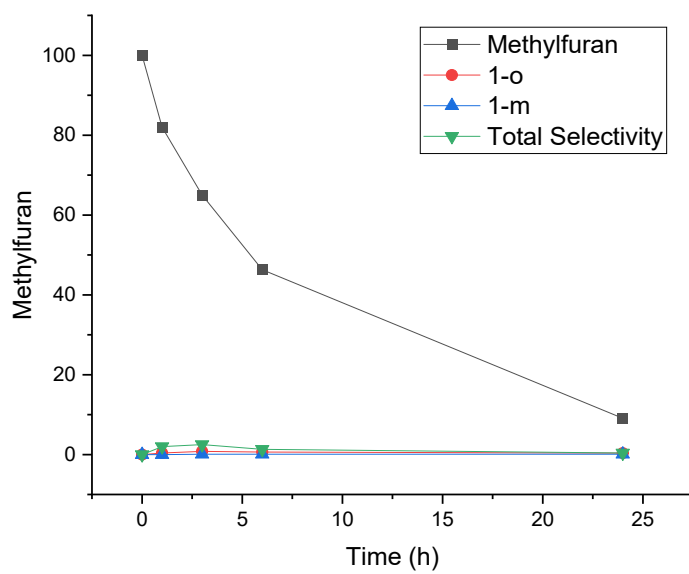

**Figure S11** Plot of the MF conversion and phenol yields as a function of the reaction time (MF (1eq.), EP (5eq.), isobutyric acid (15 mol%) and 100°C).

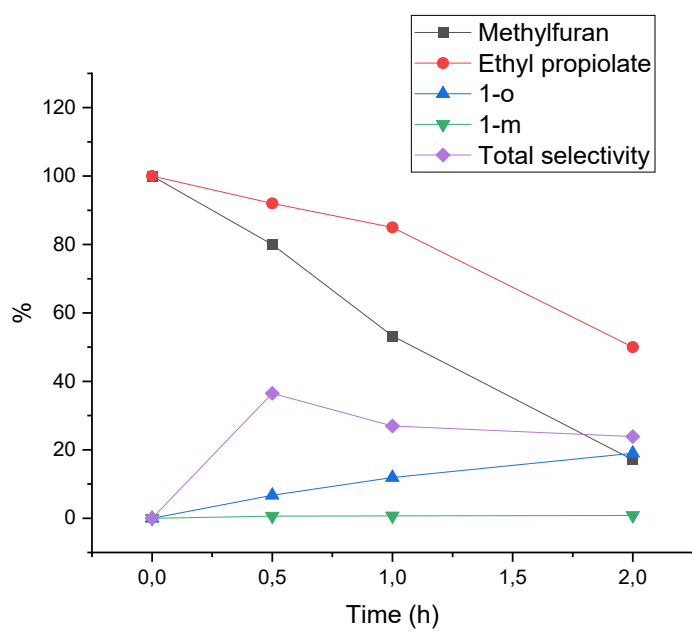

**Figure S12** Plot of the MF conversion and phenol yields as a function of the reaction time (MF (1eq.), EP (5eq.),  $\text{ZnI}_2$  (15 mol%) and  $100^\circ\text{C}$ ).

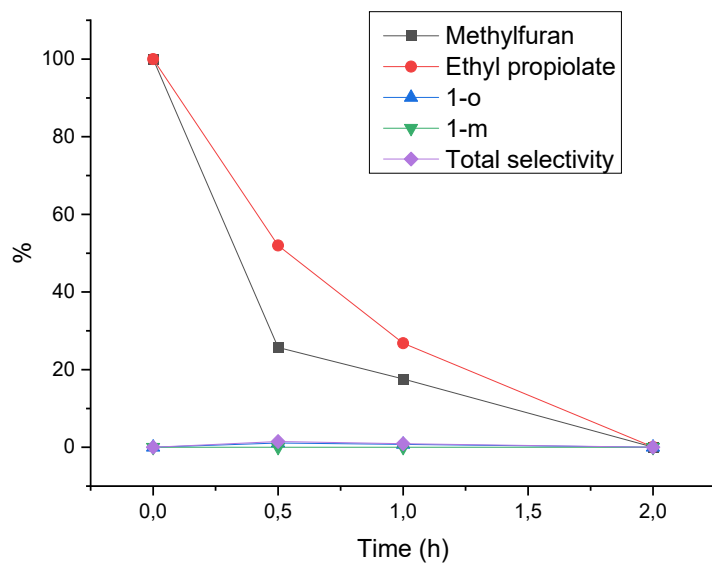

**Figure S13** Plot of the MF conversion and phenol yields as a function of the reaction time (MF (1eq.), EP (5eq.), CuCl<sub>2</sub> (15 mol%) and 100°C).

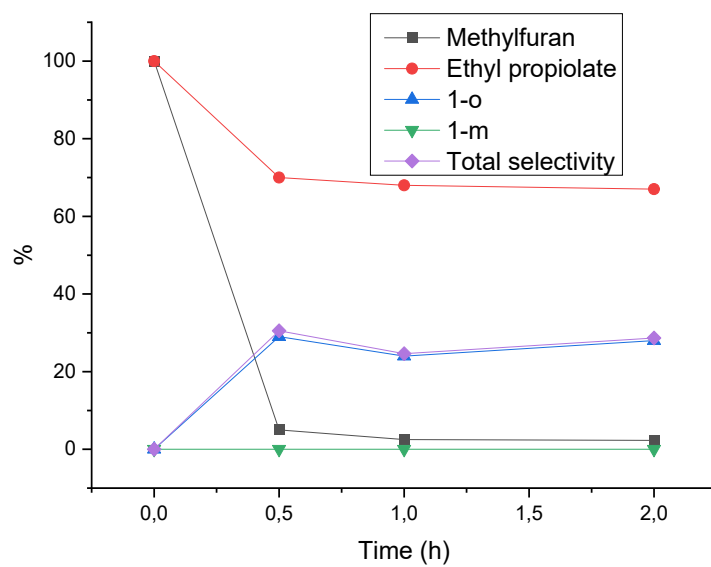

**Figure S14** Plot of the MF conversion and phenol yields as a function of the reaction time (MF (1eq.), EP (5eq.), AlCl<sub>3</sub> (15 mol%) and 100°C).

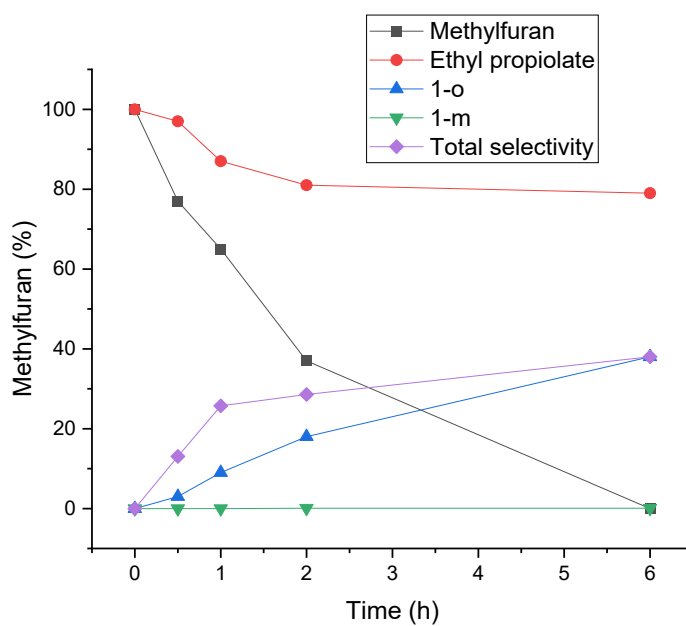

**Figure S15** Plot of the MF conversion and phenol yields as a function of the reaction time (MF (1eq.), EP (5eq.), SnCl<sub>2</sub> (15 mol%) and 100°C).

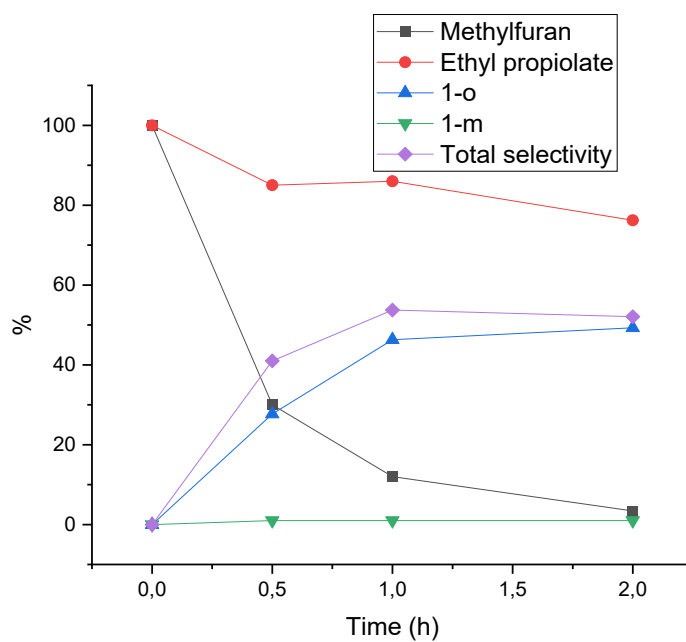

**Figure S16** Plot of the MF conversion and phenol yields as a function of the reaction time (MF (1eq.), EP (5eq.), ZnCl<sub>2</sub> (15 mol%) and 100°C).



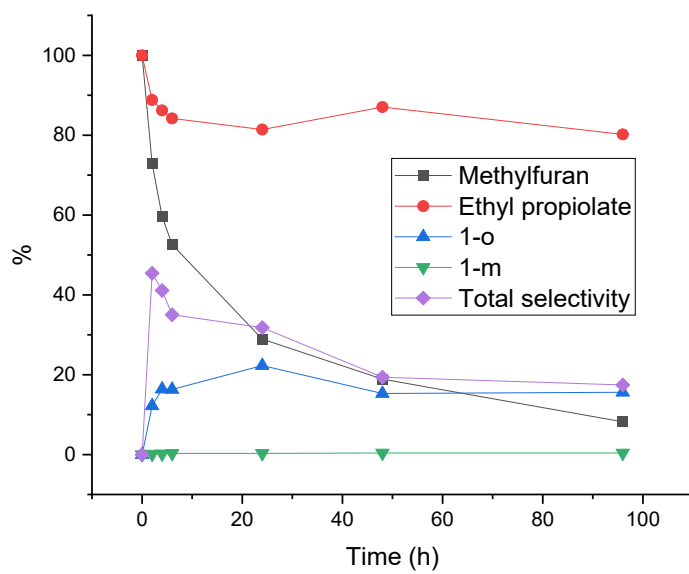

**Figure S17** Plot of the MF conversion and phenol yields as a function of the reaction time (MF (1eq.), EP (5eq.), ZnCl<sub>2</sub> (15 mol%) and 40°C).

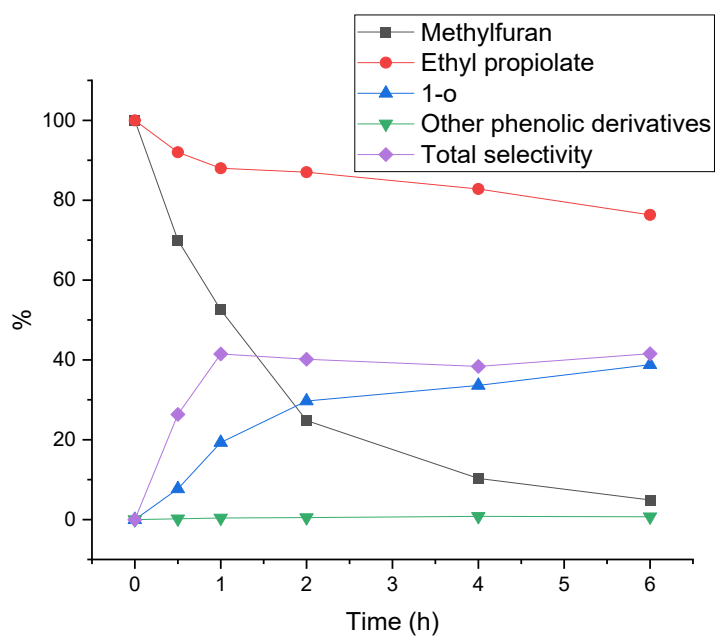

**Figure S18** Plot of the MF conversion and phenol yields as a function of the reaction time (MF (1eq.), EP (5eq.), ZnCl<sub>2</sub> (15 mol%) and 70°C).

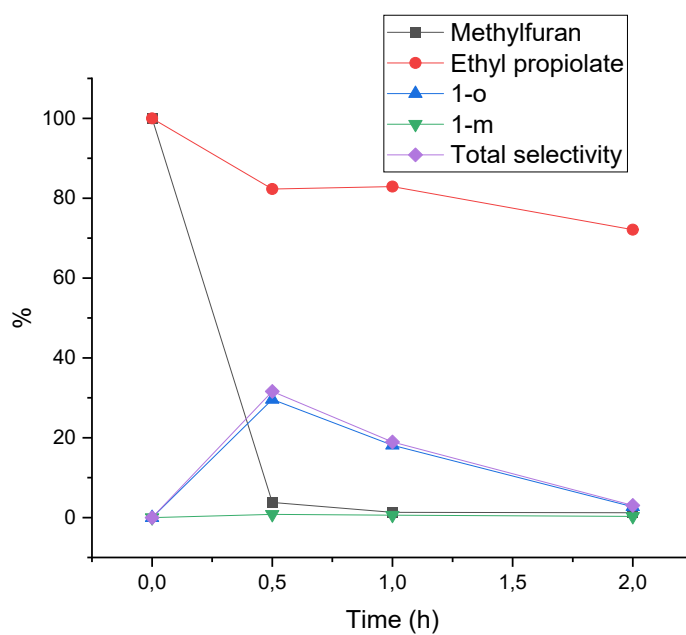

**Figure S19** Plot of the MF conversion and phenol yields as a function of the reaction time (MF (1eq.), EP (5eq.), ZnCl<sub>2</sub> (15 mol%) and 130°C).

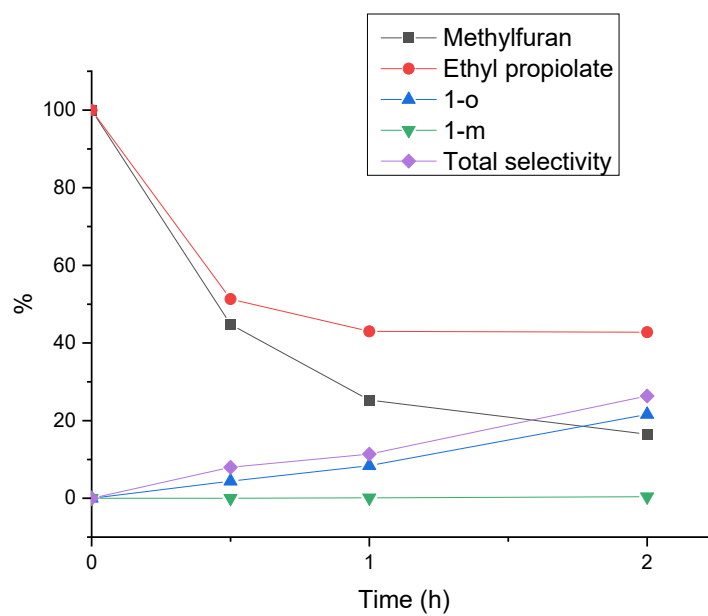

**Figure S20** Plot of the MF conversion and phenol yields as a function of the reaction time (MF (1eq.), EP (5eq.), ZnCl<sub>2</sub> (15 mol%) and 160°C.

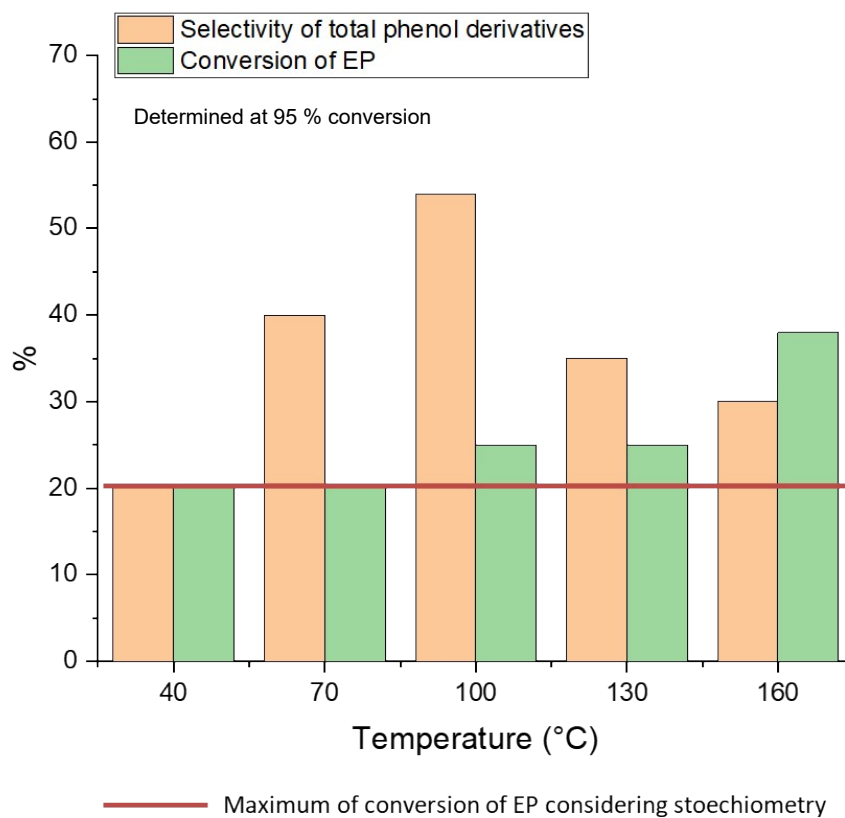

**Figure S21** Influence of the temperature on the EP conversion and selectivity to phenol **1o-m** yields (determined at 95% of MF)

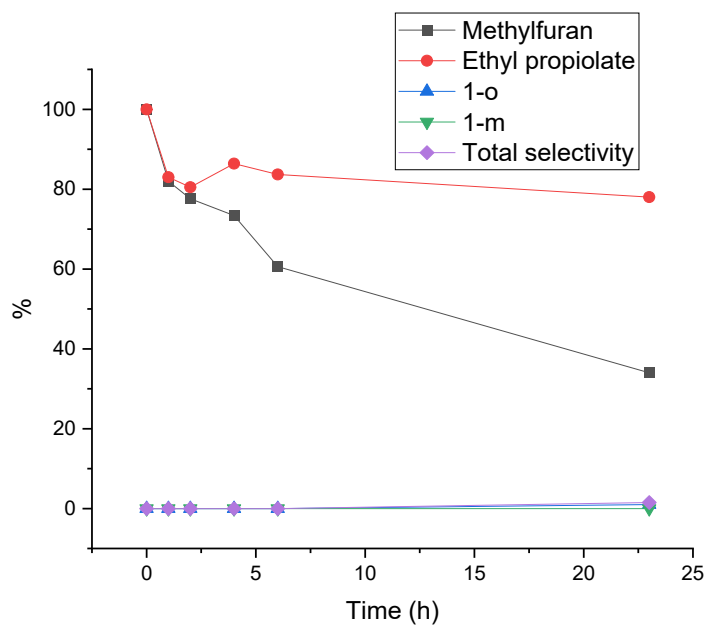

**Figure S22** Plot of the MF conversion and phenol yields as a function of the reaction time (MF (1eq.), EP (5eq.), at 100°C and without catalyst).

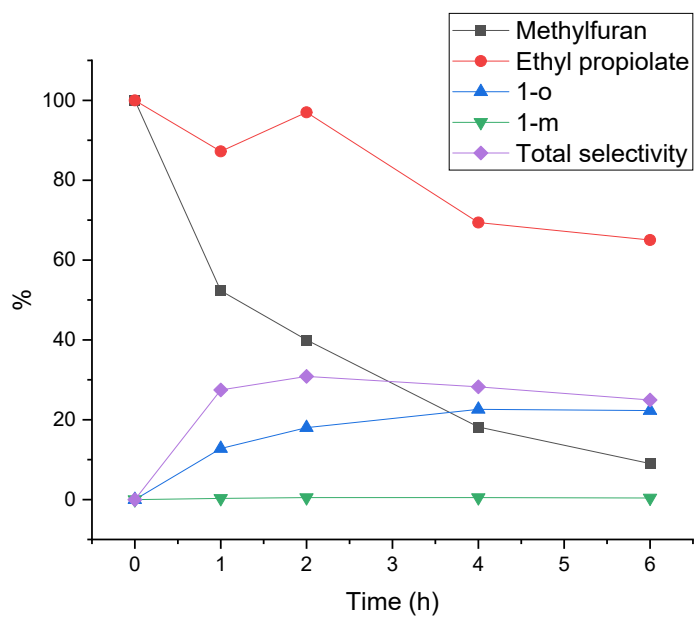

**Figure S23** Plot of the MF conversion and phenol yields as a function of the reaction time (MF (1eq.), EP (5eq.), ZnCl<sub>2</sub> (5 mol%) and 100°C).

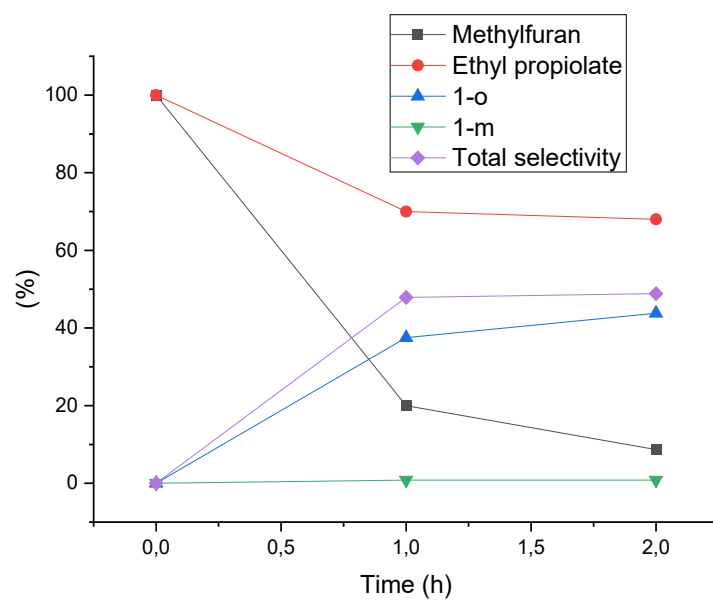

**Figure S24** Plot of the MF conversion and phenol yields as a function of the reaction time (MF (1eq.), EP (5eq.), ZnCl<sub>2</sub> (10 mol%) and 100°C).



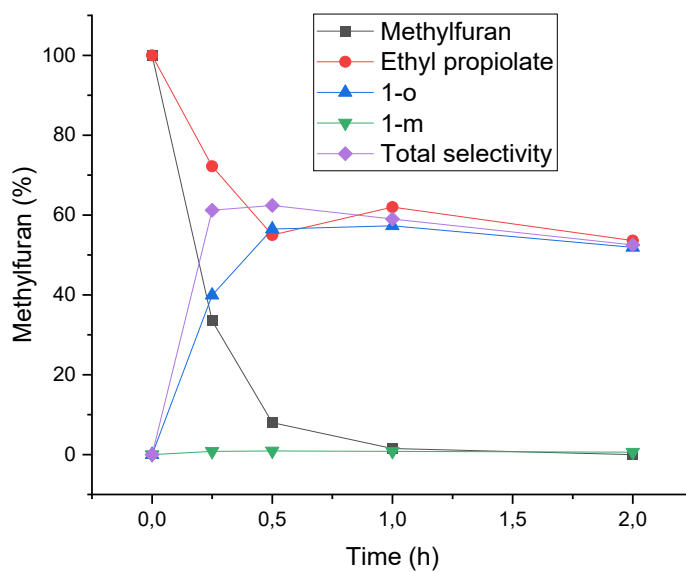

**Figure S25** Plot of the MF conversion and phenol yields as a function of the reaction time (MF (1eq.), EP (5eq.),  $\text{ZnCl}_2$  (25 mol%) and  $100^\circ\text{C}$ ).

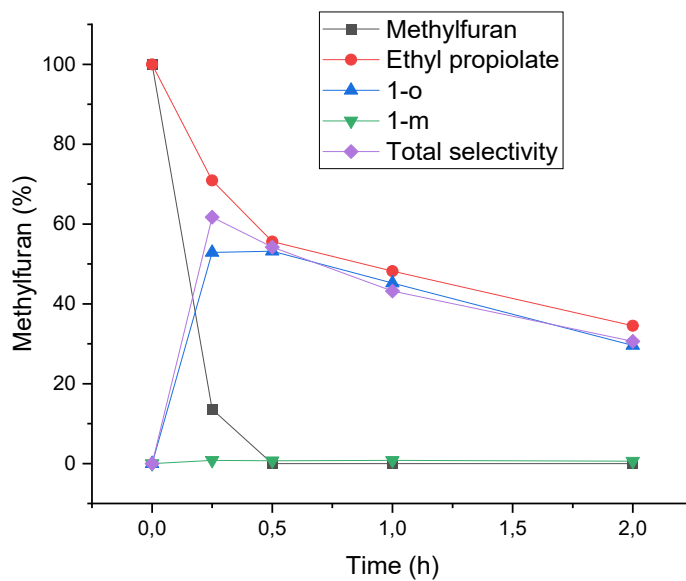

**Figure S26** Plot of the MF conversion and phenol yields as a function of the reaction time (MF (1eq.), EP (5eq.), ZnCl<sub>2</sub> (50 mol%) and 100°C).

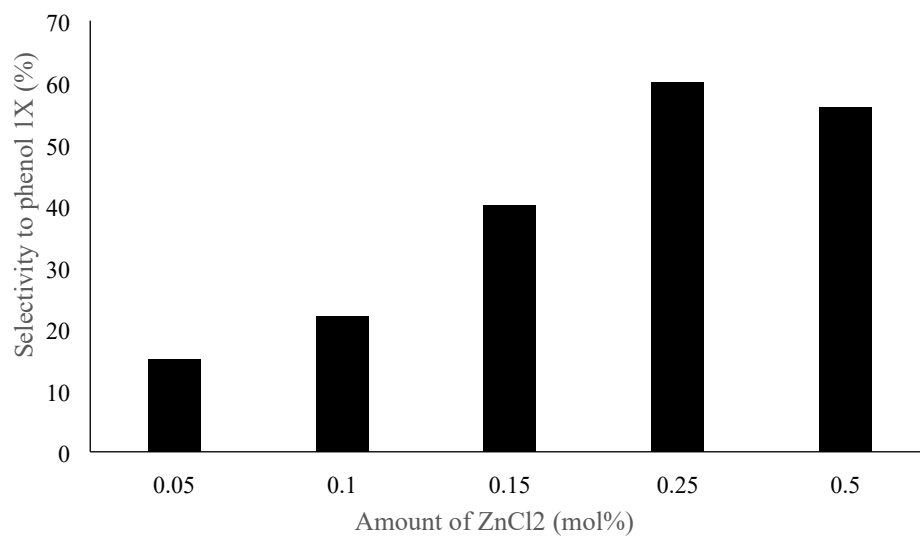

**Figure S27** Impact of the amount of ZnCl<sub>2</sub> on the selectivity to phenol **1** (determined at 60% conv. of MF) (MF (1 eq.), EP (5 eq.), 100°C).

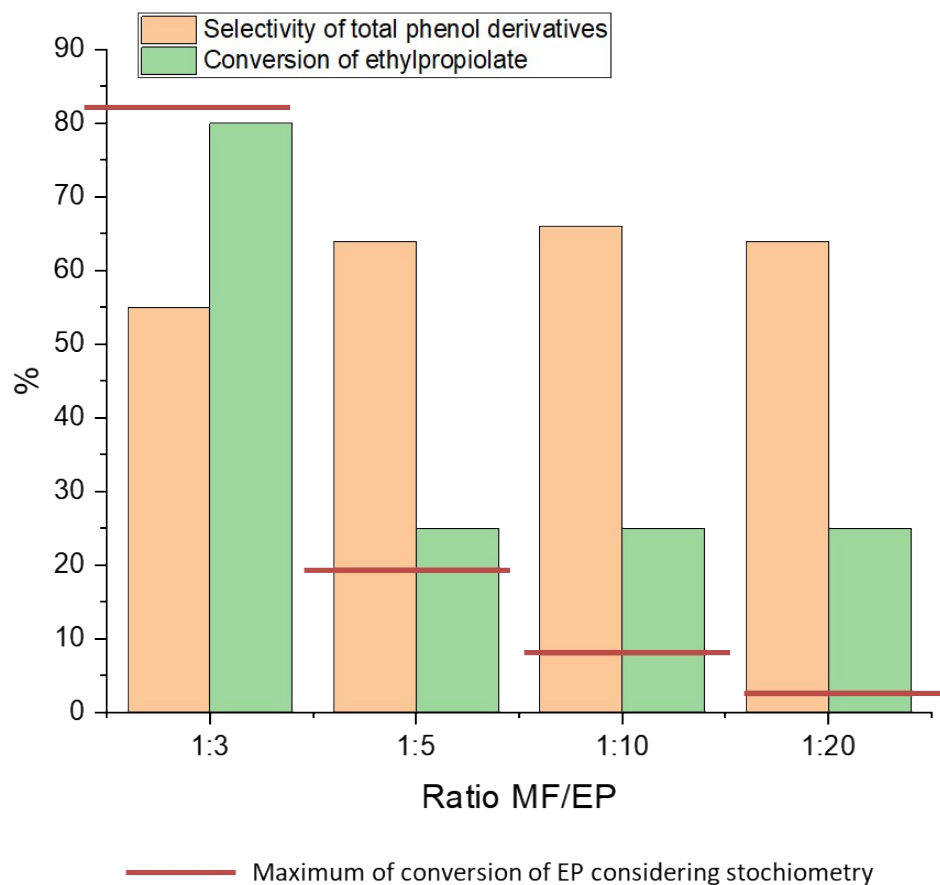

**Figure S28** Influence of the MF/EP molar ratio on the stoichiometric conversion of EP and selectivity to phenol **1o-m**

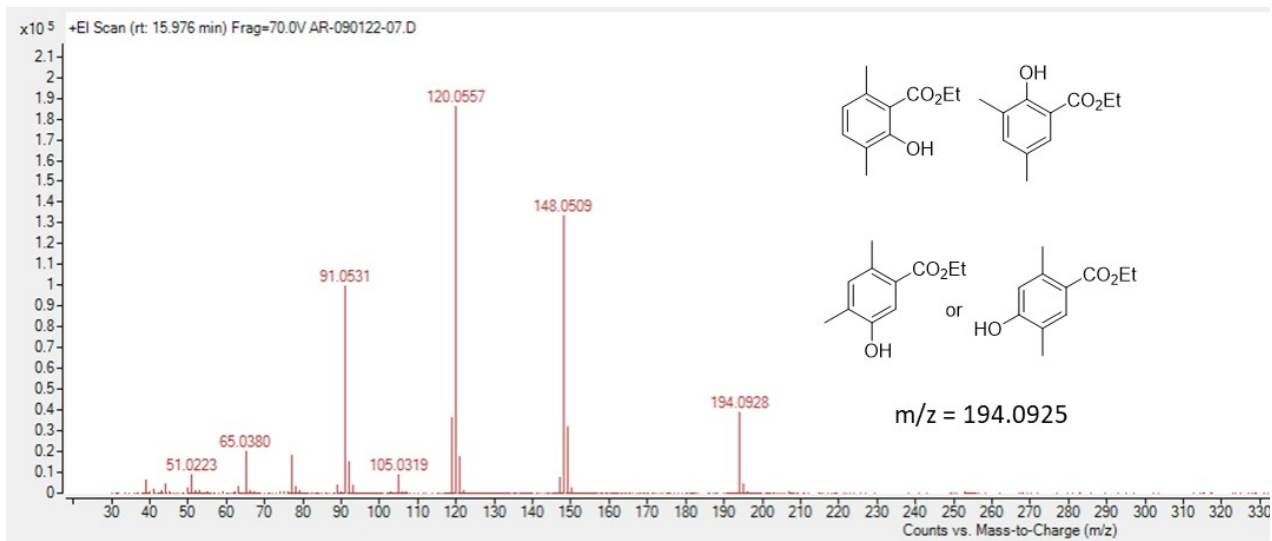

Figure S29 HRMS spectra profile of 10, 11 and 12

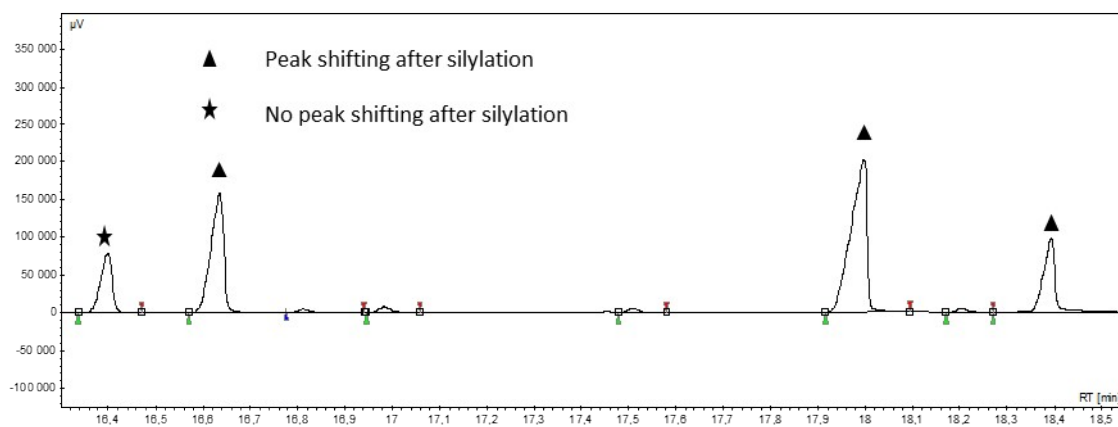

**Figure S30** GC profile and peak shifting after silylation (DMF (1eq.), EP (5 eq.), ZnCl<sub>2</sub> (15 mol % and 100°C)

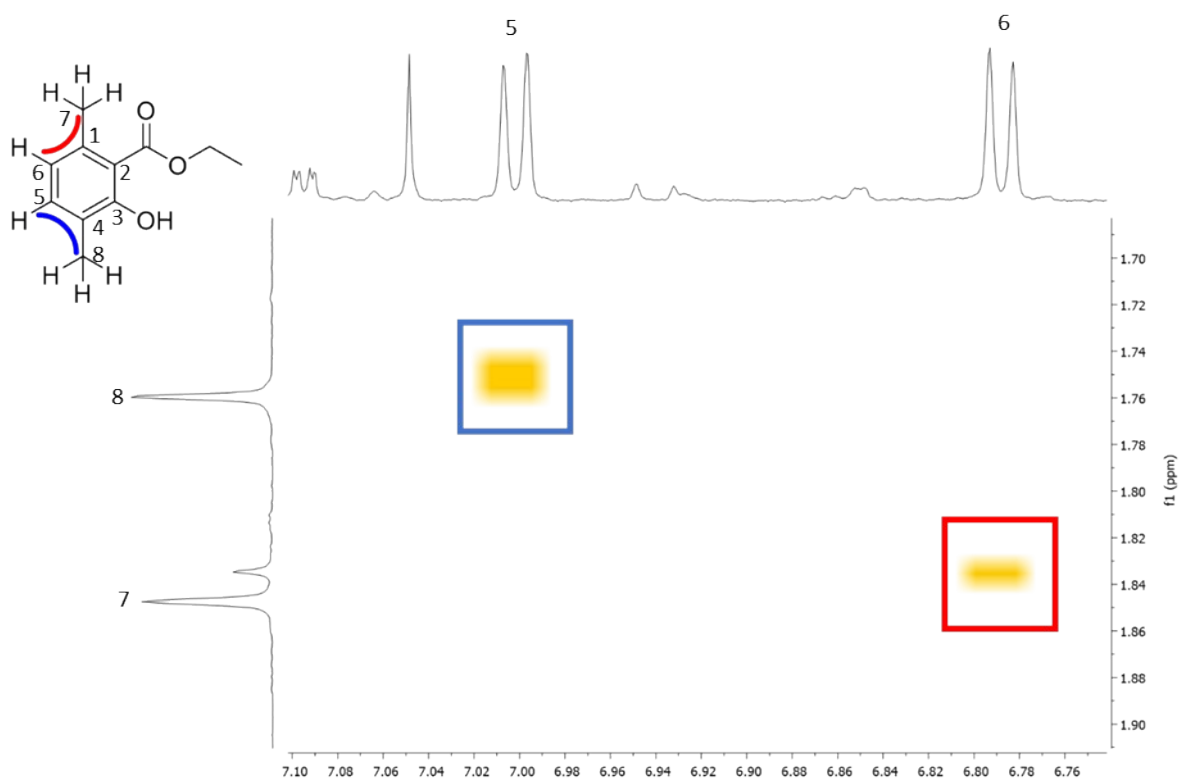

**Figure S31** COSY NMR sequence performed on phenol **10**

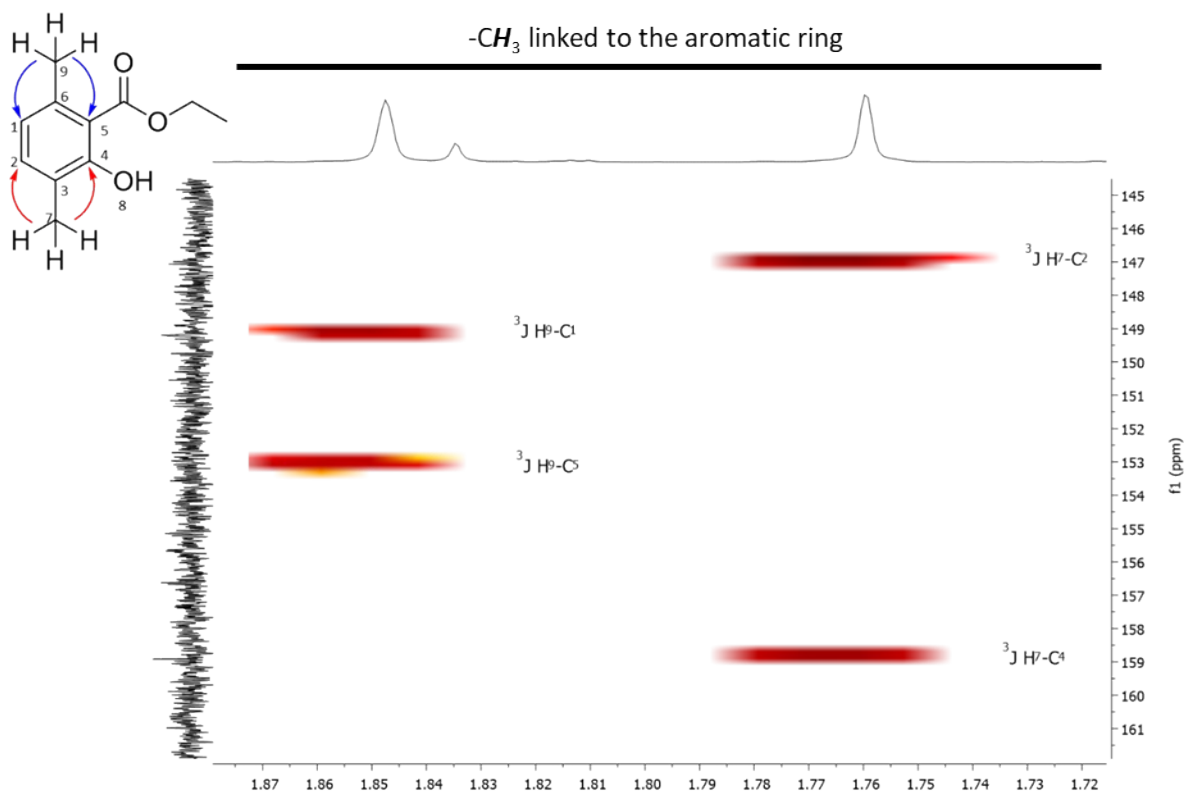

**Figure S32** HMBC sequence performed on phenol **10**

Note: H/C correlation was clearly visible in HMBC, although in the <sup>13</sup>C NMR spectrum the intensity of aromatic carbons in the selected window was very low. Presence of C peaks in this area was further confirmed by other analysis method such as HSQC and COSY sequence



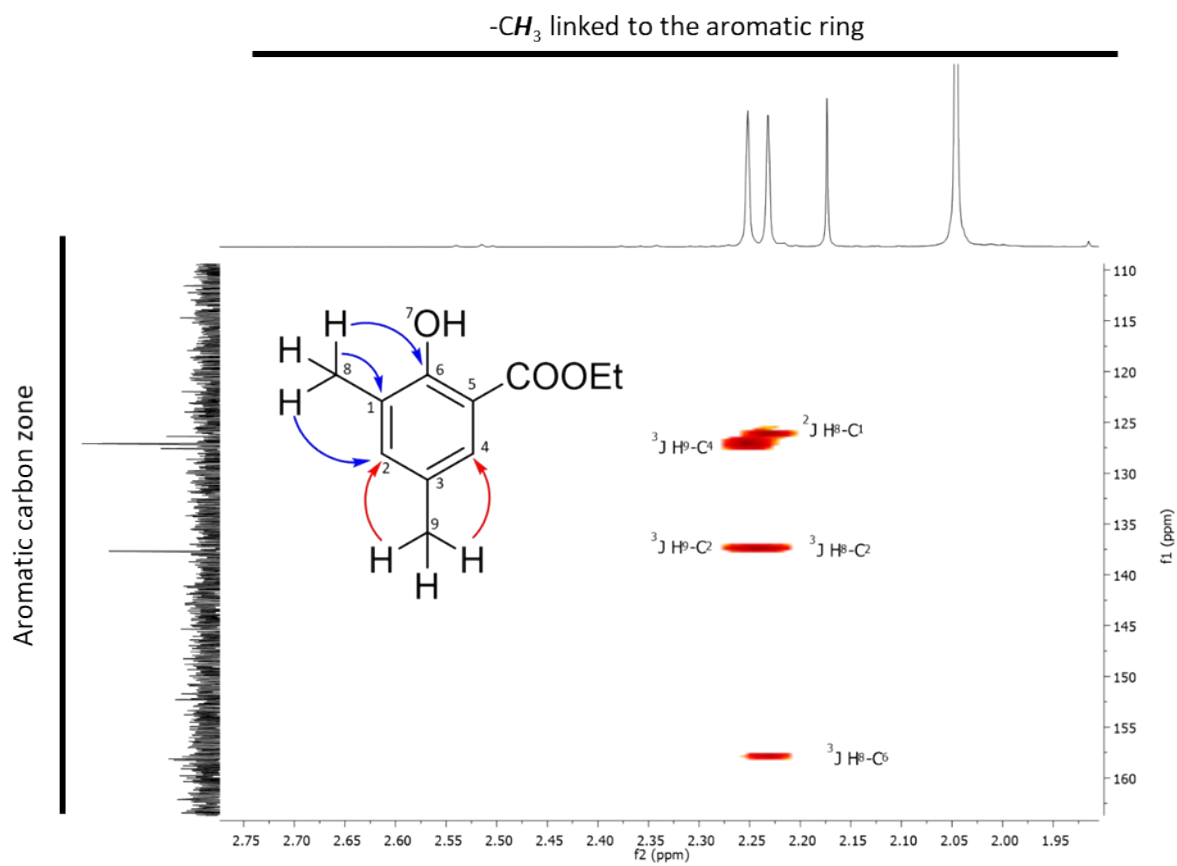

**Figure S33** HMBC sequence performed on phenol **11**

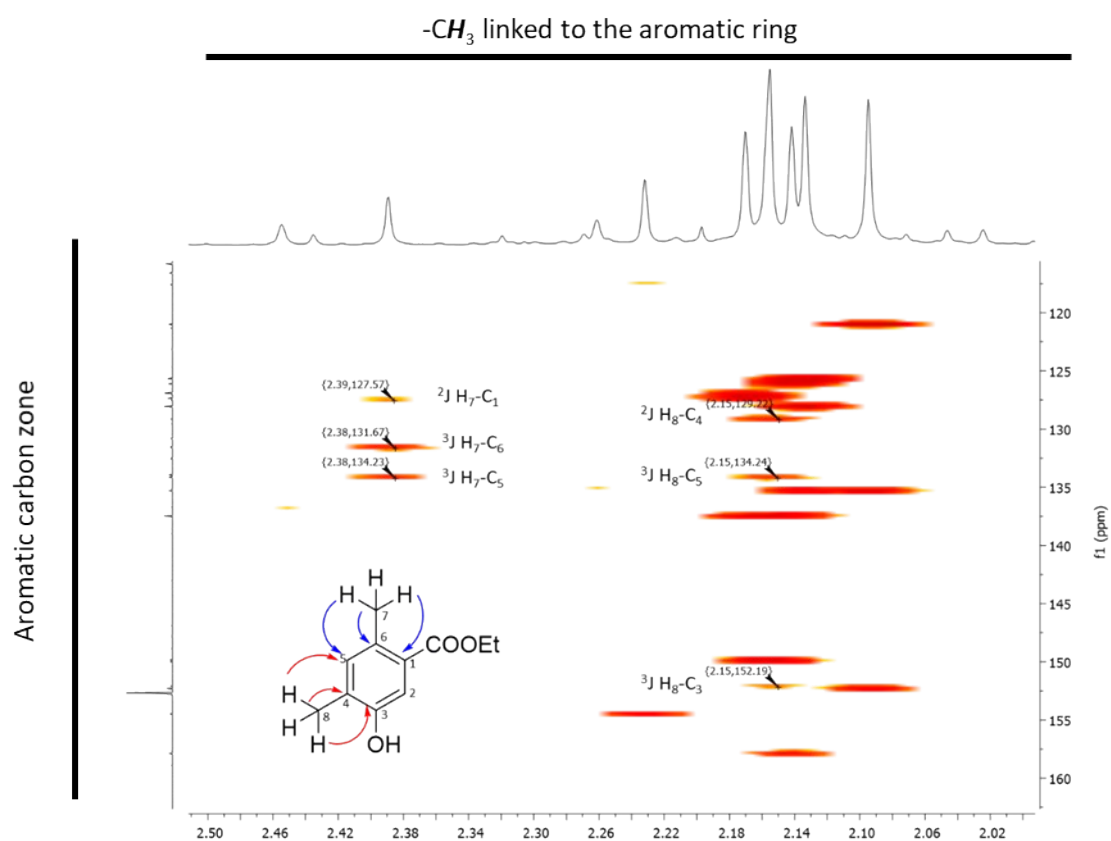

**Figure S34.** HMBC performed on the crude reaction media for structure analysis of phenol **12a** and **12b** (DMF 1 eq., EP 5 eq., 15 mol% ZnCl<sub>2</sub>, 100°C, 2h)

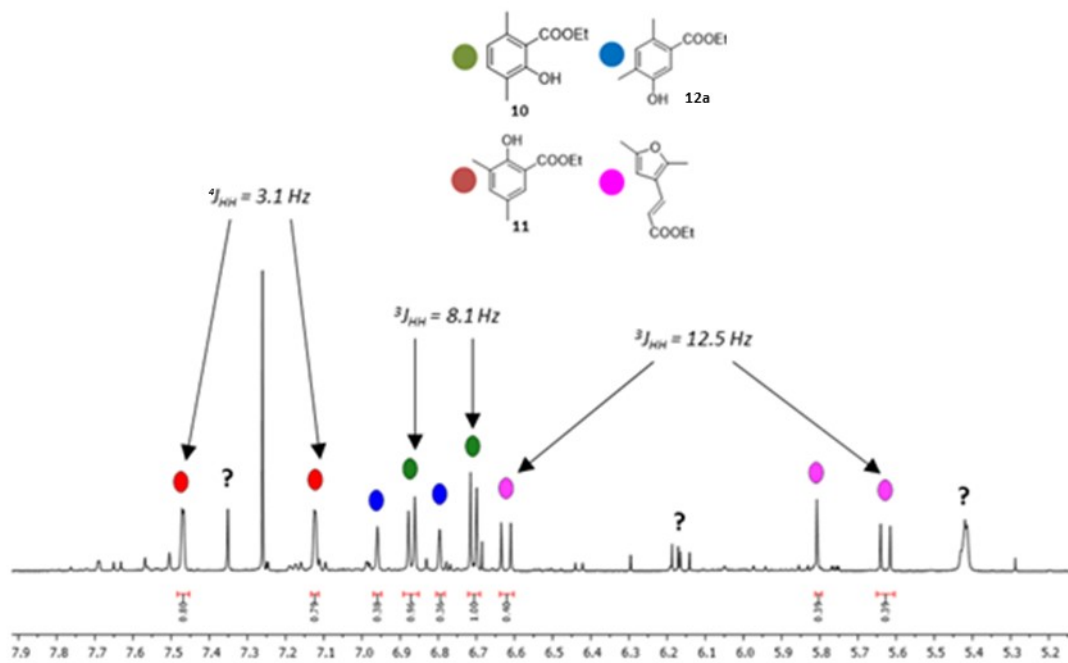

**Figure S35**  $^1\text{H}$  NMR (in  $\text{CDCl}_3$ ) of crude mixture **10**, **11** and **12** with alkylation products in *trans* position, together with unknown impurities

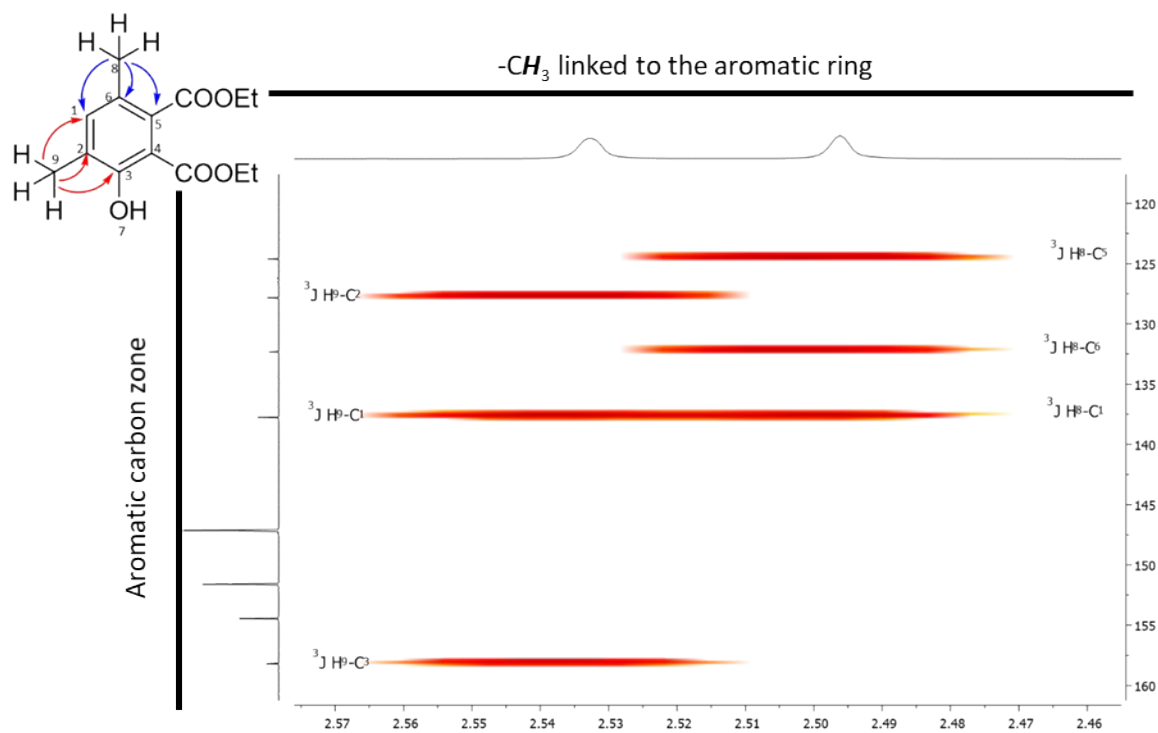

**Figure 36** HMBC sequence performed on phenol 16

### 3. Experimental procedure and chemical characterization

#### Synthesis of ethoxy-2-hydroxy-3-methylbenzoate (1-o)

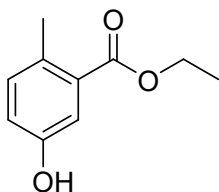

3 mmol of methyl furan (246 mg, 1 eq), 15 mmol of ethylpropiolate (1.471 g, 5 eq) and zinc chloride (60 mg, 15 %mol) were mixed and heated at 100 °C for 1 h. Then, the excess of ethylpropiolate was removed under vacuum (and could be recycled). For analysis, the crude reaction media was purified by flash chromatography (95:5 CH<sub>2</sub>Cl<sub>2</sub>/MeOH) and the product was recovered as a yellow pale powder.

<sup>1</sup>H NMR (500 MHz, CDCl<sub>3</sub>) δ 7.43 (d, <sup>4</sup>J<sub>H-H</sub> = 2.8 Hz, 1H, =CH), 7.10 (d, <sup>3</sup>J<sub>H-H</sub> = 8.3 Hz, 1H, =CH), 6.91 (dd, <sup>3</sup>J<sub>H-H</sub> = 8.3, <sup>4</sup>J<sub>H-H</sub> = 2.8 Hz, 1H, =CH), 5.64 (s, 1H, -OH), 4.35 (q, <sup>3</sup>J<sub>H-H</sub> = 7.1 Hz, 2H, -CH<sub>2</sub>-O), 2.50 (s, 3H; Ar-CH<sub>3</sub>), 1.38 (t, <sup>3</sup>J<sub>H-H</sub> = 7.1 Hz, 3H, -CH<sub>3</sub>).

<sup>13</sup>C NMR (126 MHz, CDCl<sub>3</sub>) δ 167.89, 153.65, 133.02, 132.07, 130.62, 119.35, 117.23, 61.15, 21.02, 14.41.

GC-HRMS : m/z calculated for C<sub>10</sub>H<sub>12</sub>O<sub>3</sub> [M]<sup>+</sup> 180.0786, found 180.0789.

#### Synthesis of diethyl 3-hydroxy-6-methylphthalate (3)

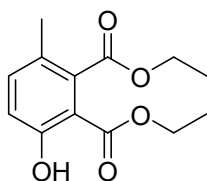

3 mmol of methyl furan (246 mg, 1 eq), 15 mmol of diethylacetylene dicarboxylate (2.552 g, 5 eq) and zinc chloride (60 mg, 15 mol%) were mixed and heated at 100 °C for 2 h. The product was pure enough to directly perform the <sup>1</sup>H NMR without additional purification.

<sup>1</sup>H NMR (500 MHz, CDCl<sub>3</sub>) δ 10.87 (s, 1H, -OH), 7.23 (d, <sup>3</sup>J<sub>H-H</sub> = 8.6 Hz, 1H, =CH), 6.88 (d, <sup>3</sup>J<sub>H-H</sub> = 8.6 Hz, 1H, =CH), 4.34 – 4.29 (m, 4H, -CH<sub>2</sub>-O), 2.16 (s, 3H, Ar-CH<sub>3</sub>), 1.34 – 1.30 (m, 6H, -CH<sub>3</sub>).

<sup>13</sup>C NMR (126 MHz, CDCl<sub>3</sub>) δ 169.09, 169.00, 159.87, 137.19, 134.86, 125.56, 118.67, 108.88, 62.15, 61.30, 18.24, 14.08, 13.84.

GC-HRMS : m/z calculated for C<sub>13</sub>H<sub>16</sub>O<sub>5</sub> [M]<sup>+</sup> 252.0998, found 252.1005.

#### Synthesis of diethyl 1-(hydroxymethyl)-7-oxabicyclo[2.2.1]hepta-2,5-diene-2,3-dicarboxylate (4)

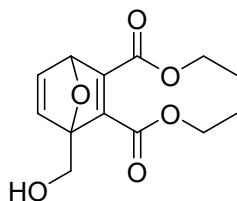

3 mmol of furfuryl alcohol (294 mg, 1 eq), 15 mmol of diethylacetylene dicarboxylate (2.552 g, 5 eq) were mixed and heated at 50 °C for 24 h. The product was pure enough to directly perform the <sup>1</sup>H NMR without additional purification.

<sup>1</sup>H NMR (500 MHz, CDCl<sub>3</sub>) δ 7.24 (dd, <sup>3</sup>J<sub>H-H</sub> = 5.3, 1.9, 1H, =CH), 7.06 (d, <sup>3</sup>J<sub>H-H</sub> = 5.3 Hz, 1H, =CH), 5.66 (d, <sup>3</sup>J<sub>H-H</sub> = 1.9 Hz, 1H, -CH), 4.34 – 4.22 (m, 6H, -CH<sub>2</sub>-O), 1.32 (m, 6H, -CH<sub>3</sub>).

<sup>13</sup>C NMR (126 MHz, CDCl<sub>3</sub>) δ 164.51, 163.01, 154.09, 152.02, 145.06, 142.67, 98.49, 84.20, 61.97, 61.64, 60.24, 14.26, 14.15.

UHPLC-HRMS: m/z calculated for C<sub>13</sub>H<sub>17</sub>O<sub>6</sub> [M+H]<sup>+</sup> 269.1020, found 269.1025.

### Synthesis of diethyl 3-hydroxy-6-(hydroxymethyl)phthalate (5)

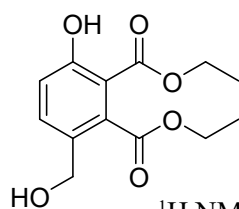

Previous crude reaction media to synthesize diethyl (4) (60 mg, 15 mol%) and heated at 100 °C for 48 h. For analysis, the crude reaction media was purified by preparative thin layer chromatography (95:5 cyclohexane/EtOAc).

$^1\text{H NMR}$  (500 MHz,  $\text{CDCl}_3$ )  $\delta$  10.83 (s, 1H, -OH), 7.48 (d,  $^3J_{\text{H-H}} = 8.5$  Hz, 1H, =CH), 7.33 (d,  $^3J_{\text{H-H}} = 8.5$  Hz, 1H, =CH), 5.17 (s, 2H, Ar- $\text{CH}_2\text{-O}$ ), 4.39 – 4.17 (m, 4H, - $\text{CH}_2\text{-O}$ ), 1.46 (t,  $^3J_{\text{H-H}} = 7.1$  Hz, 3H, - $\text{CH}_3$ ), 1.31 (t,  $^3J_{\text{H-H}} = 7.1$  Hz, 3H, - $\text{CH}_3$ ).

$^{13}\text{C NMR}$  (126 MHz,  $\text{CDCl}_3$ )  $\delta$  171.35, 169.00, 145.41, 141.93, 140.44, 127.35, 124.99, 124.94, 67.76, 62.72, 60.56, 14.33, 13.99.

UHPLC-HRMS:  $m/z$  calculated for  $\text{C}_{13}\text{H}_{17}\text{O}_6$   $[\text{M}+\text{H}]^+$  269.1020, found 269.1030.

### Synthesis of 2-(1,3-dithiolan-2-yl)furan (6)

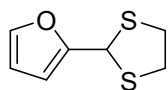

6.0 mL (72 mmol) of freshly distilled furfural, 6.7 mL (80 mmol, 1.1 eq) of ethanedithiol, 155.0 mg (0.7 mmol acid sites, *i.e.* 0.01 eq) of Amberlyst 15 and 60 mL of toluene were charged in a single-neck round bottom flask equipped with a magnetic stirring bar. The mixture was heated at 120°C for 4 hours in a Dean-Stark apparatus to continuously remove water. The reaction mixture was then cooled down to 25°C and Amberlyst 15 was filtered off. The reaction was quantitative by GC analysis. The 2-(1,3-dithiolan-2-yl)furan was isolated as follow: 100 mL of ethyl acetate were added to the crude reaction media and the organic phase was washed with water (20 mL, 3 times). After drying over  $\text{MgSO}_4$ , ethyl acetate was evaporated under reduced pressure. Purification by column chromatography over silica gel (cyclohexane:ethyl acetate, 95:5) was finally used to afford 10.92g of a colourless to pale yellow pure product (*i.e.* 87% isolated yield).

$^1\text{H NMR}$  (500MHz,  $\text{CDCl}_3$ )  $\delta$  7.35 (dd,  $^3J_{\text{H-H}} = 1.8$ ,  $^4J_{\text{H-H}} = 0.9\text{Hz}$ , 1H, =CH), 6.29-6.28 (m, 1H, =CH), 6.27 (dd,  $^3J_{\text{H-H}} = 3.2$ ,  $^3J_{\text{H-H}} = 1.8\text{Hz}$ , 1H, =CH), 5.62 (s, 1H, -CH( $\text{SCH}_2$ ) $_2$ ), 3.41-3.30 (m, 4H, - $\text{CH}_2$ ).

$^{13}\text{C NMR}$  (101 MHz,  $\text{CDCl}_3$ )  $\delta$  154.30, 142.72, 110.43, 107.18, 47.54, 39.23.

GC-HRMS :  $m/z$  calculated for  $\text{C}_7\text{H}_8\text{OS}_2$   $[\text{M}]^+$  172.0017, found 172.0014.

### Synthesis of diethyl 1-(1,3-dithiolan-2-yl)-7-oxabicyclo[2.2.1]hepta-2,5-diene-2,3-dicarboxylate (7)

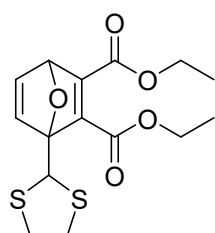

3 mmol of (6) (516 mg, 1 eq), 15 mmol of diethylacetylene dicarboxylate (2.552 g, 5 eq) were mixed and heated at 50 °C for 24 h. The product was pure enough to directly perform the  $^1\text{H NMR}$  without additional purification.

$^1\text{H NMR}$  (400 MHz,  $\text{CDCl}_3$ )  $\delta$  7.18 (dd,  $^3J_{\text{H-H}} = 5.2$ , 1.9 Hz, 1H, =CH), 6.96 (d,  $^3J_{\text{H-H}} = 5.2$  Hz, 1H, =CH), 5.64 (d,  $^3J_{\text{H-H}} = 1.9$  Hz, 1H, -CH-O), 5.40 (s, 1H, -CH-( $\text{SCH}_2$ ) $_2$ ), 4.15 (q, 4H, - $\text{CH}_2\text{-O}$ ), 3.40 – 3.08 (m, 4H, - $\text{CH}_2\text{-S}$ ), 1.31 (t,  $^3J_{\text{H-H}} = 7.1$  Hz, 3H, - $\text{CH}_3$ ), 1.24 (t,  $^3J_{\text{H-H}} = 7.1$  Hz, 3H, - $\text{CH}_3$ ).

$^{13}\text{C NMR}$  (101 MHz,  $\text{CDCl}_3$ )  $\delta$  163.95, 162.26, 153.11, 152.31, 144.79, 143.39, 102.37, 83.59, 61.71, 61.37, 50.38, 39.62, 39.29, 14.22, 13.93.

UHPLC-HRMS:  $m/z$  calculated for  $\text{C}_{15}\text{H}_{19}\text{O}_5\text{S}_2$   $[\text{M}+\text{H}]^+$  343.0669, found 343.0661.

### Synthesis of diethyl 3-(1,3-dithiolan-2-yl)-6-hydroxyphthalate (8)

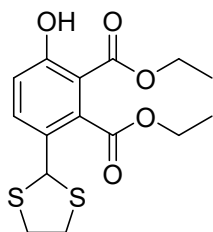

Previous crude reaction media to synthesize (8) was mixed with Amberlyst-15 (60 mg, 15 % eq.  $H^+$ ) and heated at 100 °C for 6 h. For analysis, the crude reaction media was purified by preparative thin layer chromatography (95:5 cyclohexane/EtOAc).

$^1H$  NMR (500 MHz,  $CDCl_3$ )  $\delta$  11.18 (s, 1H, -OH), 8.01 (d,  $^3J_{H-H} = 8.9$  Hz, 1H, =CH), 7.06 (d,  $^3J_{H-H} = 8.9$  Hz, 1H, =CH), 5.55 (s, 1H, *Ar-CH*-(SCH<sub>2</sub>)<sub>2</sub>), 4.36 – 4.42 (m, 4H, -CH<sub>2</sub>-S), 3.55 – 3.44 (m, 2H, -CH<sub>2</sub>-O), 3.38 – 3.29 (m, 2H, -CH<sub>2</sub>-O), 1.44 – 1.36 (m, 6H, -CH<sub>3</sub>).

$^{13}C$  NMR (126 MHz,  $CDCl_3$ )  $\delta$  169.05, 161.77, 143.93, 136.07, 134.33, 128.98, 127.98, 120.10, 62.53, 61.94, 52.03, 40.71, 14.29, 14.24, 14.06.

UHPLC-HRMS:  $m/z$  calculated for C<sub>25</sub>H<sub>19</sub>O<sub>5</sub>S<sub>2</sub> [M+H]<sup>+</sup> 343.0669, found 343.0667.

### Synthesis of diethyl 3-formyl-6-hydroxyphthalate(9)

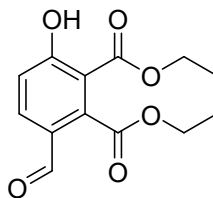

25 mg of diethyl 3-(1,3-dithiolan-2-yl)-6-hydroxyphthalate (0.07 mmol, 1 eq.) were dissolved in 2 mL of a mixture acetone and water (99 :1). 12mg of CuCl<sub>2</sub> (0.08 mmol, 2 eq.) and 15mg of CuO (0.16 mmol, 4 eq.) were then added and the mixture was heated at 30°C for 4 h. Then, it was cooled down to 25°C and 20 mL of diethyl ether was added. The solution was then filtered over silica. After removal of diethyl ether under vacuum, the phenol 9 was recovered as a yellow oil (19 mg, 98% yield).

$^1H$  NMR (500 MHz,  $CDCl_3$ )  $\delta$  11.86 (s, 1H, -OH), 9.84 (s, 1H, -CHO), 8.01 (d,  $^3J_{H-H} = 8.7$  Hz, 1H, =CH), 7.16 (d,  $^3J_{H-H} = 8.7$  Hz, 1H, =CH), 4.42 – 4.48 (m, 4H, -CH<sub>2</sub>-O), 1.34 – 1.31 (t,  $^3J_{H-H} = 7.1$  Hz, 6H, -CH<sub>3</sub>).

$^{13}C$  NMR (126 MHz,  $CDCl_3$ )  $\delta$  207.22, 188.13, 182.66, 158.81, 151.97, 136.33, 126.56, 125.63, 119.60, 63.17, 62.31, 14.19, 14.03.

UHPLC-HRMS:  $m/z$  calculated for C<sub>13</sub>H<sub>13</sub>O<sub>5</sub>S<sub>2</sub> [M-H]<sup>-</sup> 265.0707, found 265.0658.

### Synthesis of ethyl 3-hydroxy-2,6-dimethylbenzoate (10)

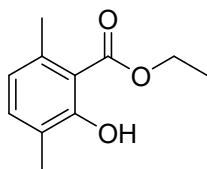

3 mmol of dimethyl furan (288 mg, 1 eq), 15 mmol of ethylpropiolate (1.471 g, 5 eq) and zinc chloride (60 mg, 15 mol%) were mixed and heated at 100 °C for 2 h. For analysis, the crude reaction media was purified by preparative thin layer chromatography (95:5 cyclohexane/EtOAc).

$^1H$  NMR (500 MHz,  $CDCl_3$ )  $\delta$  7.58 (s, 1H, =OH), 7.00 (d,  $^3J_{H-H} = 8.1$  Hz, 1H, =CH), 6.79 (d,  $^3J_{H-H} = 8.1$  Hz, 1H, =CH), 4.09 – 4.15 (m, 4H, -CH<sub>2</sub>-O), 1.85 (s, 3H, *Ar-CH*<sub>3</sub>), 1.76 (s, 3H, *Ar-CH*<sub>3</sub>), 1.33 – 1.28 (m, 6H, -CH<sub>3</sub>).

$^{13}C$  NMR (126 MHz,  $CDCl_3$ )  $\delta$  173.72, 158.71, 149.22, 147.02, 142.37, 137.96, 134.49, 46.34, 29.84, 21.18, 14.34.

GC-HRMS :  $m/z$  calculated for C<sub>11</sub>H<sub>14</sub>O<sub>3</sub> [M]<sup>+</sup> 194.0943, found 194.0925.

### Synthesis of 2-hydroxy-3,5-dimethylbenzoate (11)

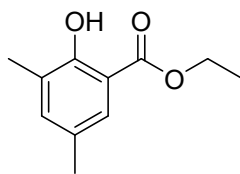

3 mmol of dimethyl furan (288 mg, 1 eq), 15 mmol of ethylpropiolate (1.471 g, 5 eq) and zinc chloride (60 mg, 15 mol%) were mixed and heated at 100 °C for 2 h. For analysis, the crude reaction media was purified by preparative thin layer chromatography (95:5 cyclohexane/EtOAc).

$^1\text{H}$  NMR (400 MHz,  $\text{CDCl}_3$ )  $\delta$  10.91 (s, 1H, -OH), 7.49 (d,  $^4J_{\text{H-H}} = 3.1$  Hz, 1H, =CH), 7.14 (d,  $^4J_{\text{H-H}} = 3.1$  Hz, 1H, =CH), 4.39 (q,  $^3J_{\text{H-H}} = 7.1$  Hz, 2H, -CH<sub>2</sub>-O), 2.25 (s, 3H, Ar-CH<sub>3</sub>), 2.23 (s, 3H, Ar-CH<sub>3</sub>), 1.41 (t,  $^3J_{\text{H-H}} = 7.1$  Hz, 3H, -CH<sub>3</sub>).

$^{13}\text{C}$  NMR (101 MHz,  $\text{CDCl}_3$ )  $\delta$  170.59, 158.16, 137.47, 137.43, 128.07, 126.90, 115.80, 61.22, 18.66, 15.49, 12.68.

GC-HRMS : m/z calculated for  $\text{C}_{11}\text{H}_{14}\text{O}_3$  [M]<sup>+</sup> 194.0943, found 194.0923.

### Synthesis of diethyl 1,4-dimethyl-7-oxabicyclo[2.2.1]hepta-2,5-diene-2,3-dicarboxylate (15)

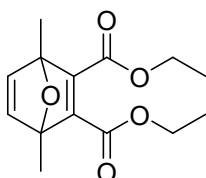

3 mmol of dimethyl furan (288 mg, 1 eq), 15 mmol of diethylacetylene dicarboxylate (2.552 g, 5 eq) were mixed and heated at 50 °C for 24 h. The crude reaction media was pure enough to be directly analyzed by  $^1\text{H}$  NMR.

$^1\text{H}$  NMR (500 MHz,  $\text{CDCl}_3$ )  $\delta$  6.83 (s, 2H, =CH), 4.14 (q,  $^3J_{\text{H-H}} = 7.1$  Hz, 4H, -CH<sub>2</sub>-O), 1.67 (s, 6H, -CH<sub>3</sub>), 1.19 (t,  $^3J_{\text{H-H}} = 7.1$  Hz, 6H, -CH<sub>3</sub>).

$^{13}\text{C}$  NMR (126 MHz,  $\text{CDCl}_3$ )  $\delta$  169.49, 154.24, 151.38, 147.09, 61.01, 15.19, 13.91.

GC-HRMS : m/z calculated for  $\text{C}_{14}\text{H}_{18}\text{O}_5$  [M]<sup>+</sup> 266.1154, found 266.1154.

### Synthesis of diethyl 3-hydroxy-4,6-dimethylphthalate (16)

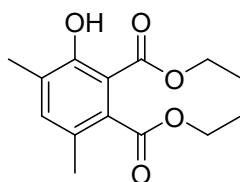

Previous crude reaction media to synthesize diethyl 3-hydroxy-4,6-dimethylphthalate was mixed with zinc chloride (60 mg, 15 mol%) and heated at 100 °C for 6 h. The crude reaction media was pure enough to be directly analyzed by  $^1\text{H}$  NMR.

$^1\text{H}$  NMR (500 MHz,  $\text{CDCl}_3$ )  $\delta$  11.47 (s, 1H, -OH), 7.48 (s, 1H, =CH), 4.72 – 4.64 (m, 4H, -CH<sub>2</sub>-O), 2.53 (s, 3H, Ar-CH<sub>3</sub>), 2.50 (s, 3H, Ar-CH<sub>3</sub>), 1.70 – 1.66 (m, 6H, -CH<sub>3</sub>).

$^{13}\text{C}$  NMR (126 MHz,  $\text{CDCl}_3$ )  $\delta$  169.42, 163.87, 158.15, 154.41, 137.70, 132.20, 127.62, 124.57, 61.91, 61.01, 18.03, 15.52, 13.95, 13.91.

GC-HRMS : m/z calculated for  $\text{C}_{14}\text{H}_{18}\text{O}_5$  [M]<sup>+</sup> 266.1154, found 266.1154.



#### 4. DFT calculations

##### a. Theoretical methods

All calculations were made using Gaussian 16. Rev B01, at the M062X/6-311++G(d,p) level of theory. It indeed proved reliable in the modelling of organic chemistry reactivity and selectivity, noticeably in related studies on Diels-Alder reactions involving furanic derivatives.<sup>2</sup>

All geometries were fully optimized, and frequency calculations conducted to confirm the nature of stationary points, in vacuum. In the case of phenol 13, a small imaginary mode ( $-14\text{ cm}^{-1}$ ) proved impossible to remove. Taking the same input file and simply changing the functional by B3LYP, also known to be reliable in organic chemistry, showed no such imaginary mode. Given the modest amplitude of the vibration mode, it was neglected.

Whenever possible, Intrinsic Reaction Coordinates calculations were undertaken to ensure transition states connect to the appropriate reagent and product geometries.

Kinetic and thermodynamic selectivities were then evaluated on the basis of the relative ZPE-corrected electronic energies.

##### b. Geometries

We list below the geometries, in Cartesian coordinates, of all considered molecules in the manuscript. Please refer to the main text for the labels. ZPE-corrected energy as well as the first vibration frequency (respectively in a.u. and  $\text{cm}^{-1}$ ) are also given.

##### **Adduct A - E+ZPE=-3313.438661 - 1st freq. = 28.5824**

|    |               |               |               |
|----|---------------|---------------|---------------|
| C  | -2.0461968794 | -0.0024945962 | 1.4897482914  |
| C  | -1.8725606803 | -0.7589237472 | 0.1524064924  |
| C  | -1.3226302108 | 1.1021711219  | 1.3827533356  |
| C  | -0.6844600674 | 1.0709687082  | -0.0251174728 |
| C  | 0.3200063767  | -0.1024347282 | -0.0356767291 |
| C  | -0.4031466272 | -1.2105071501 | 0.0787423336  |
| O  | -1.7699067244 | 0.3913528188  | -0.7452663793 |
| C  | -2.9235998789 | -1.7488993105 | -0.2716260957 |
| C  | -0.3022695979 | 2.3785704065  | -0.6613194839 |
| H  | -0.0623700404 | -2.2327429515 | 0.1640498116  |
| C  | 1.785131299   | 0.0507286895  | -0.0083150266 |
| O  | 2.3503815793  | 1.0998142532  | 0.1665914003  |
| O  | 2.414763454   | -1.116602769  | -0.1763020367 |
| C  | 3.8437411307  | -1.0506286091 | -0.1327586162 |
| H  | 4.1743450054  | -0.6776027892 | 0.8365598613  |
| H  | 4.2134386221  | -0.3898467616 | -0.9166332092 |
| H  | 4.1887053035  | -2.0680954659 | -0.2927246016 |
| H  | -1.1366218202 | 3.0834916227  | -0.6200557772 |
| H  | -0.023535506  | 2.2318487505  | -1.7052919571 |
| H  | 0.5459564709  | 2.8009827423  | -0.1233138269 |
| H  | -1.1557111324 | 1.8925432645  | 2.1000510435  |
| H  | -2.644498903  | -0.3624191635 | 2.3138535146  |
| H  | -3.9211354286 | -1.3144638072 | -0.1999912031 |
| H  | -2.8786696001 | -2.6189280931 | 0.3869090224  |
| H  | -2.7358729026 | -2.0820380881 | -1.2941150606 |
| Zn | -3.418523061  | 1.4697634567  | -1.44586445   |
| Cl | -2.7970526356 | 2.4429953473  | -3.2839922731 |
| Cl | -5.0949717651 | 1.1897125383  | -0.0815770277 |

**TSA-1 - E+ZPE=-3313.387071 - 1st freq. = -307.4397**

C -0.1686946512 -0.6033923081 2.0688400336  
C 0.3767651252 -1.5863748584 1.1416643555  
C 0.0484967871 0.6658393145 1.6942224623  
C 0.6924865734 0.7839714835 0.3031291086  
C 1.9722790179 -0.068978845 0.2825728943  
C 1.7339091651 -1.3309001577 0.6464725896  
O -0.1756421597 -0.0046628209 -0.5071839896  
C -0.2855312964 -2.8739501845 0.9201916466  
C 0.8230262343 2.2167797191 -0.1813640809  
H 2.4440599838 -2.1447542217 0.5680059778  
C 3.3073539391 0.3977070656 -0.1826870136  
O 3.6599817443 1.5456101915 -0.1817203364  
O 4.0837988969 -0.6221711107 -0.5624188428  
C 5.4054647389 -0.259337958 -0.9784511412  
H 5.9392054825 0.2198651955 -0.1578376803  
H 5.3557442282 0.4260153546 -1.82418656  
H 5.888045605 -1.1895331833 -1.2636861098  
H -0.167678367 2.6746133061 -0.1716397894  
H 1.2094337032 2.2269331002 -1.200311512  
H 1.4999957454 2.7941755586 0.4483387838  
H -0.3758050595 1.5310276693 2.1916933715  
H -0.8026864274 -0.9196333741 2.8872500072  
H -1.0217567381 -2.6931984358 0.1130681358  
H -0.8681756707 -3.1848582488 1.7889803834  
H 0.4004263523 -3.6503307651 0.5854680512  
Zn -2.1083095106 0.2241903645 -0.5407556412  
Cl -2.8965578216 2.0629097059 0.3974537678  
Cl -3.0104506205 -1.7225845571 -1.0895168717

**Int.A1 - E+ZPE=-3313.460931 - 1st freq. = 2.3779**

C 0.5989553356 1.5970677592 0.9852862106  
C -0.1465999632 1.9976887765 -0.0636154381  
C 0.3242758438 0.3161717953 1.6525144501  
C -0.8860612094 -0.484123787 1.2666201473  
C -1.742066261 0.1265441593 0.2147986525  
C -1.3427874084 1.2438947377 -0.4220169908  
O 0.4424241103 -0.8549598531 0.8091017631  
C 0.1651286874 3.2288632264 -0.8635307722  
C -1.4355033406 -1.4719415275 2.2605496029  
H -1.9505425267 1.6238332713 -1.2347175818  
C -2.9958288613 -0.5655446334 -0.2048213726  
O -3.3495319405 -1.6425843956 0.1996819173  
O -3.6877933096 0.1390575835 -1.1058899777  
C -4.8508713974 -0.5110869689 -1.6257932917  
H -5.5577881355 -0.7186013834 -0.8226503573  
H -4.5705100179 -1.4460874781 -2.1104116248  
H -5.2761967758 0.1828152812 -2.3452223689  
H -0.6903359303 -1.6533857283 3.0356662886  
H -1.6885302153 -2.4085394842 1.7693581743  
H -2.342535542 -1.0746408114 2.7182596806  
H 0.7533516418 0.1479848579 2.6330336777  
H 1.4337460184 2.1899536046 1.3402967443  
H 0.3446874333 2.956877212 -1.9077232107  
H 1.0499680699 3.7365855465 -0.4815760587

|    |               |               |               |
|----|---------------|---------------|---------------|
| H  | -0.6792204523 | 3.9224923631  | -0.8470175014 |
| Zn | 1.4118641865  | -0.4873048368 | -1.0283615077 |
| Cl | 3.4118487717  | 0.0894668878  | -0.3844810245 |
| Cl | 0.0986841883  | -0.8531901742 | -2.7237742304 |

**TSA-2 - E+ZPE=-3313.418409 - 1st freq. = -132.0782**

|    |               |               |               |
|----|---------------|---------------|---------------|
| C  | -0.5189062006 | 2.2758749138  | 0.1676630951  |
| C  | -1.8036788479 | 2.4132953819  | -0.224307465  |
| C  | 0.0519762222  | 0.9734173058  | 0.6044001766  |
| C  | -0.902350521  | -0.159562946  | 0.7370114814  |
| C  | -2.202272245  | -0.0205465951 | 0.2141085138  |
| C  | -2.6115412814 | 1.2312553715  | -0.2134528533 |
| O  | 0.7868754752  | 0.4230097271  | -0.4599954316 |
| C  | -2.4000550649 | 3.6996865602  | -0.7271827246 |
| C  | -0.3640619552 | -1.3984362517 | 1.3385356013  |
| H  | -3.6260542894 | 1.313895378   | -0.594273745  |
| C  | -3.1368857908 | -1.1845277035 | 0.1233680471  |
| O  | -2.8668690505 | -2.3041962001 | 0.4631479372  |
| O  | -4.3242938611 | -0.8348646775 | -0.3848927761 |
| C  | -5.2718880367 | -1.9028393912 | -0.5161335386 |
| H  | -5.4859451084 | -2.3343346246 | 0.4611097778  |
| H  | -4.8738410767 | -2.6754243386 | -1.1730089338 |
| H  | -6.1624293324 | -1.4519143584 | -0.9439408542 |
| H  | 0.6247273296  | -1.2264570848 | 1.7621001828  |
| H  | -0.333460785  | -2.1978571998 | 0.5932006362  |
| H  | -1.0587546105 | -1.7544448771 | 2.1054135019  |
| H  | 0.6450329629  | 1.1028856843  | 1.524619954   |
| H  | 0.1775232762  | 3.107262217   | 0.108249715   |
| H  | -2.753705897  | 3.5870197895  | -1.7544887901 |
| H  | -1.6621051344 | 4.5007806672  | -0.7069318483 |
| H  | -3.2502671743 | 4.0017821735  | -0.1115299181 |
| Zn | 2.6325634642  | -0.1826806745 | -0.2275549942 |
| Cl | 3.638236336   | -1.0506282766 | -1.9557792144 |
| Cl | 3.1126221967  | 0.1917210297  | 1.9153334673  |

**Int.A2 - E+ZPE=-3313.475049 - 1st freq. = 26.9998**

|   |               |               |               |
|---|---------------|---------------|---------------|
| C | -0.5776690807 | 2.1900648884  | -0.710805613  |
| C | -1.9451080994 | 2.4128366596  | -0.6225971415 |
| C | -0.024263126  | 0.9199440358  | -0.4979926421 |
| C | -0.8648206488 | -0.1758765245 | -0.1955605082 |
| C | -2.2432774783 | 0.0727159319  | -0.0674263977 |
| C | -2.7745291516 | 1.3418716518  | -0.2888951734 |
| O | 1.3008579603  | 0.776119829   | -0.5670520832 |
| C | -2.5241108201 | 3.7774045602  | -0.8912645829 |
| C | -0.2366242836 | -1.544424925  | -0.0875669943 |
| H | -3.8417876814 | 1.4912246883  | -0.1867010049 |
| C | -3.1592411043 | -1.0155997795 | 0.3904971103  |
| O | -2.8227571068 | -1.9731539465 | 1.0405844244  |
| O | -4.4313045847 | -0.8015464102 | 0.026093878   |
| C | -5.3694658383 | -1.7771869458 | 0.4836435835  |
| H | -5.3679175008 | -1.8223838071 | 1.5728875133  |
| H | -5.1161148744 | -2.7602292722 | 0.0866258459  |
| H | -6.3370498785 | -1.4508854345 | 0.1124184646  |
| H | 0.576533281   | -1.6338630042 | -0.8143027985 |
| H | -0.951235866  | -2.3380415938 | -0.2874815947 |

|    |               |               |               |
|----|---------------|---------------|---------------|
| H  | 0.1484127591  | -1.7620136674 | 0.9204718054  |
| H  | -0.2399543983 | 0.6906430883  | 1.9062920109  |
| H  | 0.1060082292  | 2.999133146   | -0.9440738069 |
| H  | -2.8075772391 | 3.869405941   | -1.9431896171 |
| H  | -1.8008311616 | 4.5635166373  | -0.6714111158 |
| H  | -3.4178873741 | 3.9507574711  | -0.2903019302 |
| Zn | 2.239043536   | -0.2475393989 | 0.6504260182  |
| Cl | 3.830005284   | -1.4524870153 | 1.4135396429  |
| Cl | 0.7440002473  | 0.481092196   | 2.7324377067  |

**TSA-3 - E+ZPE=-3313.416467 - 1st freq. = -114.2953**

|    |               |               |               |
|----|---------------|---------------|---------------|
| C  | -1.2528724314 | 2.662064368   | -0.4191800486 |
| C  | -2.5090072239 | 2.1252639693  | -0.6743235464 |
| C  | -0.3307389131 | 1.9034258295  | 0.268947434   |
| C  | -0.5314806501 | 0.4880161907  | 0.6697278364  |
| C  | -1.907517551  | -0.0146000037 | 0.2999626193  |
| C  | -2.8190533455 | 0.7675248916  | -0.3128943238 |
| O  | 0.3445552237  | -0.1109637862 | -0.2416321557 |
| C  | -3.5520690114 | 2.9080945053  | -1.3898283015 |
| C  | -0.1775260876 | 0.2800036809  | 2.1473013747  |
| H  | -3.7798220761 | 0.3623196182  | -0.6073590255 |
| C  | -2.2001669561 | -1.4724894622 | 0.5361438329  |
| O  | -1.6114740918 | -2.1637784726 | 1.3174368738  |
| O  | -3.2022868666 | -1.9022342182 | -0.234586177  |
| C  | -3.5176511601 | -3.2942378013 | -0.0971982598 |
| H  | -3.8346010975 | -3.5069259796 | 0.9235723374  |
| H  | -2.6420220265 | -3.8966034492 | -0.3369609523 |
| H  | -4.3225699104 | -3.4824566017 | -0.8014251401 |
| H  | 0.7717496719  | 0.779066073   | 2.3513795536  |
| H  | -0.0808702383 | -0.7870930313 | 2.336221655   |
| H  | -0.9473805965 | 0.6912191464  | 2.8069953397  |
| H  | 0.6605115244  | 2.2908633191  | 0.4961868088  |
| H  | -1.0096058624 | 3.6613397657  | -0.7583644064 |
| H  | -3.7810233023 | 2.4127889807  | -2.3396021264 |
| H  | -3.2409322042 | 3.9319526384  | -1.5858573177 |
| H  | -4.4782875035 | 2.9073086862  | -0.8078288126 |
| Zn | 2.2971840858  | -0.1468419807 | -0.2276243076 |
| Cl | 3.2260262695  | -1.7633103043 | -1.3658000609 |
| Cl | 3.0989323309  | 1.6181914281  | 0.8860052969  |

**Int.A3 - E+ZPE=-3313.485704 - 1st freq. = 10.8456**

|   |               |               |               |
|---|---------------|---------------|---------------|
| C | 1.4145904119  | -2.5005355791 | -0.0826851293 |
| C | 2.6309811503  | -2.0652788647 | -0.4447735946 |
| C | 0.3418572171  | -1.5926206044 | 0.4166979125  |
| C | 0.5969768734  | -0.1308997332 | 0.1873892121  |
| C | 1.9822890717  | 0.2915652004  | -0.009114684  |
| C | 2.9040037993  | -0.6383692823 | -0.3528303489 |
| O | -0.3180438799 | 0.6929458208  | 0.1820530317  |
| C | 3.7390659581  | -2.9686611763 | -0.9090496726 |
| C | 0.1911968221  | -1.7805544298 | 1.9551701306  |
| H | 3.9126059824  | -0.2978751081 | -0.5711162065 |
| C | 2.3387796285  | 1.7329137275  | 0.1565336185  |
| O | 1.7842718367  | 2.483370622   | 0.9068931101  |
| O | 3.3912671957  | 2.0723064043  | -0.6023763608 |
| C | 3.8260447257  | 3.4292568343  | -0.4578346927 |

|    |               |               |               |
|----|---------------|---------------|---------------|
| H  | 4.1338626696  | 3.618253999   | 0.570568265   |
| H  | 3.0168410331  | 4.1100363444  | -0.7205382509 |
| H  | 4.6638215369  | 3.5432899968  | -1.1397810441 |
| H  | -0.0638521482 | -2.8197157533 | 2.1633563496  |
| H  | -0.6147535076 | -1.1480204801 | 2.3257615047  |
| H  | 1.1255944158  | -1.5326463447 | 2.4623120874  |
| H  | -0.6252543745 | -1.8467568985 | -0.0271967817 |
| H  | 1.1861825541  | -3.562556931  | -0.0865626848 |
| H  | 4.0608733741  | -2.6982373163 | -1.9178082927 |
| H  | 3.4160402404  | -4.0092623639 | -0.9197715276 |
| H  | 4.6090024458  | -2.8846031252 | -0.252780087  |
| Zn | -2.375301296  | 0.7501346116  | 0.1670869149  |
| Cl | -3.0129020583 | 2.6546163636  | -0.6376034281 |
| Cl | -3.1333736784 | -1.1880869336 | 0.8607666495  |

**TSB-1 - E+ZPE=-3313.391257 - 1st freq. = -293.9683**

|    |               |               |               |
|----|---------------|---------------|---------------|
| C  | -0.3045578548 | -1.3564040076 | 1.3962008138  |
| C  | 0.0697135647  | -1.5622690134 | -0.0762819955 |
| C  | 0.1516408461  | -0.1972818867 | 1.8864187139  |
| C  | 1.0058150847  | 0.5445953665  | 0.9662311893  |
| C  | 2.0400855139  | -0.2434603646 | 0.274886726   |
| C  | 1.5780797727  | -1.3942117336 | -0.2293538354 |
| O  | -0.3890891885 | -0.3819320799 | -0.7221533308 |
| C  | -0.4679008665 | -2.8482142003 | -0.6786459618 |
| C  | 0.9856553003  | 2.0090777054  | 0.9429850485  |
| H  | 2.1810656883  | -2.0573915436 | -0.8391819611 |
| C  | 3.4120735252  | 0.2908478749  | 0.0845852634  |
| O  | 3.7936564161  | 1.3505417497  | 0.5095212801  |
| O  | 4.1780638889  | -0.558112197  | -0.6004112134 |
| C  | 5.5286812787  | -0.1293787149 | -0.8150228865 |
| H  | 6.0296878631  | 0.0223516273  | 0.1406534395  |
| H  | 5.5397913437  | 0.8014061543  | -1.3812143279 |
| H  | 6.0018413658  | -0.929049087  | -1.3770818092 |
| H  | 0.0368047895  | 2.4081215252  | 1.2963657567  |
| H  | 1.2253287462  | 2.3877842657  | -0.0509770143 |
| H  | 1.8109783584  | 2.3300612059  | 1.5992691779  |
| H  | -0.1745259984 | 0.2726396995  | 2.8066574562  |
| H  | -1.0315619935 | -1.9886051522 | 1.8930873558  |
| H  | -1.5535369426 | -2.8756673934 | -0.5754401412 |
| H  | -0.0414060978 | -3.7238237339 | -0.182086814  |
| H  | -0.2143604639 | -2.8823092579 | -1.7393031142 |
| Zn | -2.1934342576 | 0.3139079641  | -0.4588213512 |
| Cl | -2.1867999905 | 2.5114289639  | -0.6280623308 |
| Cl | -3.6083226922 | -1.1677327364 | 0.3871588664  |

**Int.B1 - E+ZPE=-3313.462791 - 1st freq. = 18.1062**

|   |               |               |               |
|---|---------------|---------------|---------------|
| C | -0.5920698875 | -1.269104723  | 1.510775652   |
| C | 0.0346543848  | -1.9477056481 | 0.3579819284  |
| C | -0.1301635127 | -0.0856521386 | 1.9507165183  |
| C | 1.1018424414  | 0.5378647826  | 1.4642748791  |
| C | 1.8230861962  | -0.1018834801 | 0.506864958   |
| C | 1.2805874871  | -1.2991332289 | -0.1590875657 |
| O | 0.0176625272  | -1.1472174753 | -0.8515744411 |
| C | -0.2780324115 | -3.3956076396 | 0.1257284221  |
| C | 1.5010778821  | 1.8361060194  | 2.1050470539  |

|    |               |               |               |
|----|---------------|---------------|---------------|
| H  | 1.9678608261  | -1.9045406496 | -0.7346699792 |
| C  | 3.1447831067  | 0.4083638052  | 0.0607568067  |
| O  | 3.7383019168  | 1.3350297159  | 0.546542808   |
| O  | 3.6272481671  | -0.3018491164 | -0.9747790162 |
| C  | 4.8914021932  | 0.1385102646  | -1.4773974517 |
| H  | 5.6498628932  | 0.0771025714  | -0.6969886231 |
| H  | 4.8172054661  | 1.1688579412  | -1.8244449871 |
| H  | 5.1289715425  | -0.5290853108 | -2.3009286291 |
| H  | 0.7042608647  | 2.1950461963  | 2.7555451682  |
| H  | 1.7047673408  | 2.5873781131  | 1.3416207824  |
| H  | 2.4183267394  | 1.7191529442  | 2.6846779882  |
| H  | -0.6447495166 | 0.4148820016  | 2.7634487471  |
| H  | -1.443083377  | -1.7496727335 | 1.9803191123  |
| H  | -1.3510400795 | -3.5072908896 | -0.0467210004 |
| H  | 0.0063207242  | -3.984730013  | 0.9995345603  |
| H  | 0.2605303368  | -3.7661490359 | -0.7462621947 |
| Zn | -1.3877807863 | 0.4245869476  | -0.805008286  |
| Cl | -0.4578810708 | 2.3749714808  | -1.0214001202 |
| Cl | -3.2183833946 | -0.7544657017 | -0.6394970905 |

**TSB-3 - E+ZPE=-3313.425822 - 1st freq. = -202.1995**

|    |               |               |               |
|----|---------------|---------------|---------------|
| C  | 0.1480253683  | 2.5527409799  | 0.3445421669  |
| C  | 0.1978246417  | 1.889388083   | -0.9960172259 |
| C  | -0.6965204033 | 2.1547788874  | 1.308708193   |
| C  | -1.6234378861 | 1.0667956836  | 1.1019559341  |
| C  | -1.7025578936 | 0.4493570162  | -0.1614000204 |
| C  | -0.8805000611 | 0.8948811072  | -1.176807657  |
| O  | 1.1997744073  | 0.9006038657  | -1.0408425091 |
| C  | 0.3699459969  | 2.8885152693  | -2.1255845907 |
| C  | -2.464481018  | 0.6563228546  | 2.254319531   |
| H  | -0.9136014384 | 0.4187627974  | -2.149764702  |
| C  | -2.6122511081 | -0.7114130559 | -0.3995057302 |
| O  | -3.5558089551 | -0.998003327  | 0.2881168248  |
| O  | -2.25721309   | -1.3931253247 | -1.4913134561 |
| C  | -3.0668088575 | -2.536284597  | -1.7926719237 |
| H  | -4.0993918142 | -2.2308474556 | -1.9601191893 |
| H  | -3.0278061398 | -3.2457319195 | -0.9668448482 |
| H  | -2.6379610217 | -2.9679227543 | -2.6921446366 |
| H  | -2.1377361737 | 1.1487115266  | 3.167457134   |
| H  | -2.4369932136 | -0.4266709835 | 2.3779663524  |
| H  | -3.5094996741 | 0.9065388101  | 2.0423532693  |
| H  | -0.6707626384 | 2.6048859961  | 2.2932399113  |
| H  | 0.8659526097  | 3.3472397585  | 0.5270707158  |
| H  | 1.321520197   | 3.4060283439  | -1.9889944481 |
| H  | -0.4408399531 | 3.6216828905  | -2.1440706414 |
| H  | 0.4033946557  | 2.3544581144  | -3.0757589125 |
| Zn | 1.8419178287  | -0.481385257  | 0.1855545426  |
| Cl | 3.7385942531  | -1.3690313408 | -0.4375494042 |
| Cl | 0.534970381   | -0.9273929692 | 1.9457363203  |

**Int.B3 - E+ZPE=-3313.437199 - 1st freq. = 21.9370**

|   |               |              |               |
|---|---------------|--------------|---------------|
| C | -0.2570429456 | 1.76440976   | 0.3301850037  |
| C | -0.1340126585 | 0.5835936391 | 1.3073726986  |
| C | 1.0434173214  | 2.290165077  | -0.1506665365 |
| C | 2.1204527732  | 1.4987000765 | -0.2799593944 |

|    |               |               |               |
|----|---------------|---------------|---------------|
| C  | 1.9958959013  | 0.0685263682  | 0.09310789    |
| C  | 0.9494952056  | -0.34840748   | 0.8209092814  |
| O  | -1.327546285  | -0.091108646  | 1.5166520785  |
| C  | 0.3130597703  | 1.1742715845  | 2.6612425439  |
| C  | 3.4279608864  | 2.0595295684  | -0.7633944635 |
| H  | 0.8577049415  | -1.3847396913 | 1.1264182615  |
| C  | 3.0151902807  | -0.9173166695 | -0.3781564668 |
| O  | 3.8251740966  | -0.7067767892 | -1.2432951539 |
| O  | 2.9210461844  | -2.0948095996 | 0.2554101111  |
| C  | 3.8278582962  | -3.1034095531 | -0.1951752608 |
| H  | 4.8577452515  | -2.7759403233 | -0.0533242956 |
| H  | 3.663025918   | -3.3152396178 | -1.2516802821 |
| H  | 3.6158499334  | -3.9798578263 | 0.4108380359  |
| H  | 3.3758786564  | 3.1477233459  | -0.7960805591 |
| H  | 3.6709087933  | 1.6760254202  | -1.7543843241 |
| H  | 4.2471156419  | 1.7615653687  | -0.1054979581 |
| H  | 1.0945762148  | 3.3336864936  | -0.4393625701 |
| H  | -0.9097547766 | 2.5293894815  | 0.7453552048  |
| H  | -0.4755568406 | 1.8316256215  | 3.0329823854  |
| H  | 1.2515519507  | 1.7254179525  | 2.5841824912  |
| H  | 0.4301463089  | 0.349437769   | 3.3640643078  |
| Zn | -2.4513812509 | -0.5363061074 | 0.1252176566  |
| Cl | -1.2440673027 | 1.2193447794  | -1.1953790109 |
| Cl | -4.0557562665 | -1.5712510028 | -0.8456186744 |

**TSB-5 - E+ZPE=-3313.429748 - 1st freq. = -280.3961**

|    |               |               |               |
|----|---------------|---------------|---------------|
| C  | 0.0363768836  | 1.7131083636  | 1.2415714251  |
| C  | -0.086641473  | 0.2559228281  | 1.1647411388  |
| C  | 1.1611184038  | 2.3523689009  | 0.8390752517  |
| C  | 2.2748356542  | 1.6516282242  | 0.2752450791  |
| C  | 2.1989921474  | 0.2687920109  | 0.1491629812  |
| C  | 1.0232759363  | -0.4020168443 | 0.5326583984  |
| O  | -1.2822961675 | -0.2951566797 | 1.2034321394  |
| C  | 0.7517436746  | -0.2480506615 | 2.6436953871  |
| C  | 3.4580904971  | 2.4587357451  | -0.1623147323 |
| H  | 0.9294680392  | -1.4666323302 | 0.3620681803  |
| C  | 3.2965259423  | -0.5238628661 | -0.4828297779 |
| O  | 4.2778285328  | -0.0536769811 | -0.9946444528 |
| O  | 3.0601224561  | -1.8374718281 | -0.4136029857 |
| C  | 4.0272688386  | -2.6712758094 | -1.0623478355 |
| H  | 5.0072047161  | -2.5337275066 | -0.6060320855 |
| H  | 4.0818487676  | -2.4212022537 | -2.1213339347 |
| H  | 3.674280293   | -3.6890026266 | -0.9245297019 |
| H  | 3.3234816273  | 3.5060323556  | 0.103153334   |
| H  | 3.5900995958  | 2.3694771117  | -1.2427313333 |
| H  | 4.3801098716  | 2.0795827341  | 0.2801307333  |
| H  | 1.2247555205  | 3.4316773177  | 0.9115203384  |
| H  | -0.8197791826 | 2.2493983862  | 1.6369643574  |
| H  | -0.0672116654 | 0.0335696009  | 3.3012465987  |
| H  | 1.6701805918  | 0.2936109897  | 2.8471248537  |
| H  | 0.8727917281  | -1.3275783296 | 2.6587168658  |
| Zn | -2.1645442314 | -0.7832686693 | -0.474131654  |
| Cl | -0.5571376913 | -0.4150191387 | -1.9959166571 |
| Cl | -4.2183373062 | -1.498234044  | -0.5088309117 |

**TSB-4 - E+ZPE=-3313.427330 - 1st freq. = -310.2134**

|    |               |               |               |
|----|---------------|---------------|---------------|
| C  | -0.0002328338 | -1.6115351446 | 0.8635607995  |
| C  | 0.0537937207  | -0.1866307111 | 1.0362179571  |
| C  | -1.1536172142 | -2.2623255521 | 0.4045392385  |
| C  | -2.2740259118 | -1.5583017186 | 0.0203437984  |
| C  | -2.2522295058 | -0.1190361577 | 0.1301434465  |
| C  | -1.142324765  | 0.5234843787  | 0.5880638569  |
| O  | 1.1872396424  | 0.4639180726  | 1.147297383   |
| C  | -0.4359902709 | -0.6467315521 | 2.7034718243  |
| C  | -3.4537721021 | -2.3085087704 | -0.5202027153 |
| H  | -1.1046126149 | 1.6055217334  | 0.633946336   |
| C  | -3.4467591428 | 0.6965912128  | -0.2754810833 |
| O  | -4.5395457363 | 0.2462885325  | -0.4950196857 |
| O  | -3.1611255858 | 1.9979006637  | -0.3503679463 |
| C  | -4.2525360373 | 2.8478867086  | -0.7215651017 |
| H  | -5.0585541025 | 2.7629383551  | 0.0068520597  |
| H  | -4.6250526641 | 2.5680914173  | -1.7064984344 |
| H  | -3.8458615784 | 3.8547414452  | -0.7344157522 |
| H  | -3.2173262268 | -3.3688082955 | -0.5954858995 |
| H  | -3.7356130417 | -1.9274585296 | -1.502818943  |
| H  | -4.3279436606 | -2.1714207841 | 0.1181117447  |
| H  | -1.13484115   | -3.3392097513 | 0.2949952711  |
| H  | 0.9041314841  | -2.1654313282 | 1.0867209658  |
| H  | 0.2863711691  | -1.3303645757 | 3.1401243073  |
| H  | -1.4635990125 | -0.9838618672 | 2.7918566966  |
| H  | -0.2694309536 | 0.3543936731  | 3.0928056034  |
| Zn | 2.4889297964  | 0.400767385   | -0.31934864   |
| Cl | 1.5914981284  | -1.121132395  | -1.6919196147 |
| Cl | 4.2728091699  | 1.6430415553  | -0.2640334729 |

**Int.B5 - E+ZPE=-3313.487927 - 1st freq. = 16.8602**

|    |               |               |               |
|----|---------------|---------------|---------------|
| C  | 0.057882606   | -1.6985125763 | 0.2654153079  |
| C  | 0.1650977685  | -0.2014803852 | 0.3035333237  |
| C  | -1.3145306135 | -2.2156640171 | -0.0022279937 |
| C  | -2.4136528227 | -1.4535818113 | -0.1126820944 |
| C  | -2.2431123846 | 0.0010995833  | 0.0061673669  |
| C  | -1.0402230488 | 0.5930207556  | 0.1833702851  |
| O  | 1.2564606414  | 0.3621580021  | 0.4489505938  |
| C  | -3.7650574921 | -2.0595182109 | -0.3879272708 |
| H  | -0.9373413566 | 1.6682903439  | 0.247724699   |
| C  | -3.461914007  | 0.8886754027  | -0.0059337907 |
| O  | -4.5301559874 | 0.5612960885  | 0.4329018467  |
| O  | -3.2028539582 | 2.0876013427  | -0.5257656339 |
| C  | -4.299891136  | 3.0101146664  | -0.5159316229 |
| H  | -4.6209219969 | 3.1976797971  | 0.508417757   |
| H  | -5.1343609469 | 2.6035330769  | -1.0866789641 |
| H  | -3.9214882457 | 3.9176910113  | -0.9765713867 |
| H  | -3.6511388533 | -3.1235733145 | -0.5937759145 |
| H  | -4.240941551  | -1.5896764911 | -1.2511518199 |
| H  | -4.4389452562 | -1.9266240388 | 0.4578653497  |
| H  | -1.4015946015 | -3.2942138039 | -0.0970448043 |
| H  | 0.7250922397  | -2.0199660338 | -0.5497201466 |
| Zn | 3.175219843   | -0.3710729841 | 0.4410756383  |
| Cl | 3.2916675081  | -1.7148822077 | -1.2845616861 |
| Cl | 4.2354857727  | 0.326066582   | 2.1967778732  |



|   |               |               |              |
|---|---------------|---------------|--------------|
| C | 0.6177029251  | -2.3055074972 | 1.5737795034 |
| H | -0.0078478091 | -2.0249985944 | 2.4226608327 |
| H | 0.6389092079  | -3.392159214  | 1.4929634832 |
| H | 1.6363405651  | -1.9640398625 | 1.7713230983 |

**Int.B4 - E+ZPE=-3313.489742 - 1st freq. = 11.5046**

|    |               |               |               |
|----|---------------|---------------|---------------|
| C  | 0.0998450616  | -1.3850854112 | -0.1730726893 |
| C  | 0.1292283302  | 0.0427731908  | 0.0690553458  |
| C  | 1.2629378823  | -2.0563535178 | -0.2833560597 |
| C  | 2.5912499126  | -1.4528877761 | -0.16668939   |
| C  | 2.6632347396  | -0.1127935579 | -0.0038196384 |
| C  | 1.4431480275  | 0.762829722   | -0.0130960726 |
| O  | -0.8880361437 | 0.71447293    | 0.2761592681  |
| C  | 3.7693419351  | -2.3905226653 | -0.2194894262 |
| C  | 3.9851369595  | 0.5630275107  | 0.1503270007  |
| O  | 5.0561257067  | 0.0597840321  | -0.068367623  |
| O  | 3.8467679459  | 1.8261165994  | 0.5812243372  |
| C  | 5.0684528695  | 2.548058221   | 0.7687375614  |
| H  | 5.6165921166  | 2.6094440841  | -0.1713236395 |
| H  | 5.6884885864  | 2.0482191377  | 1.5125722822  |
| H  | 4.775434026   | 3.5362382009  | 1.1114673281  |
| H  | 3.4274810361  | -3.4251437413 | -0.1970643199 |
| H  | 4.4511897525  | -2.2214154176 | 0.6132788719  |
| H  | 4.3510163636  | -2.2298533323 | -1.1288010676 |
| H  | 1.228450335   | -3.1299037535 | -0.4422099686 |
| H  | -0.8614293684 | -1.8841127818 | -0.2085983941 |
| Zn | -2.9160437151 | 0.4132116352  | 0.4455528157  |
| Cl | -3.2693846443 | -1.6654729392 | 1.0249874003  |
| Cl | -3.8709664013 | 2.2913352745  | -0.0615555128 |
| H  | 1.4820555142  | 1.4750501209  | 0.8148490728  |
| C  | 1.3935072873  | 1.5897774116  | -1.3307608113 |
| H  | 2.2862232765  | 2.2085826221  | -1.4057666982 |
| H  | 1.3474119663  | 0.9221743243  | -2.1937841744 |
| H  | 0.5107903617  | 2.2290393168  | -1.3204868985 |

**TSB-2 - E+ZPE=-3313.422028 - 1st freq. = -45.1395**

|   |               |               |               |
|---|---------------|---------------|---------------|
| C | -0.8777723205 | 0.0686267942  | 2.1318040188  |
| C | -0.5498734434 | -1.1532381834 | 1.5613929016  |
| C | -0.0119628371 | 1.1377782086  | 1.9784299833  |
| C | 1.2472002529  | 1.0962551853  | 1.2801888546  |
| C | 1.5496879172  | -0.0690964339 | 0.6526756591  |
| C | 0.597839054   | -1.2305023794 | 0.6116601281  |
| O | -0.1059463163 | -1.1697568399 | -0.6116483733 |
| C | -1.3927856559 | -2.3576827416 | 1.6945593697  |
| C | 2.0555097084  | 2.362932653   | 1.2243813598  |
| H | 1.1341861848  | -2.1807031493 | 0.6970353823  |
| C | 2.7559801686  | -0.1861496542 | -0.2294154508 |
| O | 3.4102700105  | 0.7415539845  | -0.6219935803 |
| O | 3.0142986702  | -1.4600671496 | -0.5299724704 |
| C | 4.1058497481  | -1.6662411999 | -1.4322420143 |
| H | 5.0296847266  | -1.2852984604 | -0.9968991154 |
| H | 3.9109222185  | -1.1513465308 | -2.3726090522 |
| H | 4.1618638856  | -2.740091969  | -1.5838624603 |
| H | 1.7165911805  | 3.0578349983  | 1.9932597606  |
| H | 1.9210660051  | 2.831115205   | 0.246822766   |

|    |               |               |               |
|----|---------------|---------------|---------------|
| H  | 3.1187687993  | 2.1708585943  | 1.3529102728  |
| H  | -0.3014558652 | 2.0947913987  | 2.4033882486  |
| H  | -1.8120856005 | 0.1932183071  | 2.6655195946  |
| H  | -2.3627805649 | -2.1418643657 | 2.137770933   |
| H  | -0.8526261855 | -3.0909421932 | 2.3069421142  |
| H  | -1.5290585767 | -2.7972570674 | 0.7015037512  |
| Zn | -1.5238344669 | 0.1592973109  | -0.9010683338 |
| Cl | -0.9182252224 | 2.3030270947  | -0.8647496257 |
| Cl | -3.5365124748 | -0.7151364168 | -0.6478026219 |

**Int.B2 - E+ZPE=-3313.503922 - 1st freq. = 22.9716**

|    |               |               |               |
|----|---------------|---------------|---------------|
| C  | -2.4445740115 | -2.3071708145 | 1.0418538913  |
| C  | -1.0824548138 | -2.0060196317 | 1.5526383252  |
| C  | -3.1285237445 | -1.4559921375 | 0.2713311006  |
| C  | -2.610847367  | -0.137782851  | -0.0705091008 |
| C  | -1.3969748779 | 0.2750844816  | 0.4048443486  |
| C  | -0.5519024941 | -0.6412014081 | 1.180243364   |
| O  | 0.5878951662  | -0.3511443197 | 1.5338836693  |
| C  | -0.0730245662 | -3.0807667745 | 1.083788116   |
| C  | -3.4885554484 | 0.686659479   | -0.9673614164 |
| H  | -1.1037482108 | -2.0282913232 | 2.6512901544  |
| C  | -0.8577255469 | 1.6364013544  | 0.1519277944  |
| O  | 0.3194145913  | 1.9142792911  | 0.011489946   |
| O  | -1.7859247378 | 2.5788762986  | 0.1292506944  |
| C  | -1.3152900518 | 3.9183849543  | -0.1044978735 |
| H  | -0.808430025  | 3.9719621503  | -1.0670843596 |
| H  | -0.6247944585 | 4.2097137799  | 0.6855401237  |
| H  | -2.205385558  | 4.5400927784  | -0.0948673883 |
| H  | -4.1281462972 | 0.0315526041  | -1.5582641082 |
| H  | -2.9152170886 | 1.3255051823  | -1.6347612975 |
| H  | -4.1282872053 | 1.3331853524  | -0.3596656862 |
| H  | -4.1031225024 | -1.7236925624 | -0.1187732201 |
| H  | -2.8611487295 | -3.2781972184 | 1.291369283   |
| H  | -0.4063564641 | -4.0680297184 | 1.4060755174  |
| H  | 0.9047660391  | -2.8700881639 | 1.5137968419  |
| H  | 0.0155819541  | -3.0616535168 | -0.003169195  |
| Zn | 1.9135538198  | 0.5002041412  | 0.0586461697  |
| Cl | 3.7040265023  | 1.398587006   | 0.925155397   |
| Cl | 1.2770681266  | -0.8411904134 | -1.6145470916 |

**Phenol 10 - E+ZPE=-613.701635 - 1st freq. = 28.4332**

|   |               |               |               |
|---|---------------|---------------|---------------|
| C | -1.202104525  | -0.2951076672 | -0.0630534201 |
| C | 0.1764695894  | -0.3091724355 | -0.0142089946 |
| C | 0.8448078212  | 0.9276486168  | 0.02011124    |
| C | 0.131245733   | 2.1508214224  | 0.0051361319  |
| C | -1.2888229718 | 2.1315042381  | -0.0454999136 |
| C | -1.9231912021 | 0.9002333751  | -0.0785220834 |
| C | 0.9411818367  | 3.3858162194  | 0.0442966549  |
| O | 2.1616600137  | 3.4033107886  | 0.0876871359  |
| O | 0.2504300679  | 4.5248868759  | 0.0295757348  |
| C | 1.0295384989  | 5.7242476968  | 0.0673717804  |
| H | 1.690736053   | 5.7723767969  | -0.7973963195 |
| H | 0.3088072147  | 6.5372055415  | 0.0485218703  |
| H | 1.6275127783  | 5.7575018713  | 0.9776715183  |

|   |               |               |               |
|---|---------------|---------------|---------------|
| H | -3.0052357721 | 0.8672080246  | -0.1173298886 |
| C | -2.1600870346 | 3.3650126001  | -0.0659807089 |
| H | -2.0082863644 | 3.9802134789  | 0.8213129367  |
| H | -1.946763714  | 3.9946961697  | -0.9301507967 |
| H | -3.2061813343 | 3.0617080816  | -0.1052602664 |
| C | 0.9847323983  | -1.5747012593 | 0.0037242448  |
| H | 1.6030841574  | -1.627172559  | 0.9025616994  |
| H | 0.3311234919  | -2.4466794502 | -0.0274634556 |
| H | 1.6660238217  | -1.611865047  | -0.8492242671 |
| O | 2.1823917191  | 0.8536135426  | 0.066833678   |
| H | 2.5420015321  | 1.7631986983  | 0.087300933   |
| H | -1.7362251691 | -1.2395181205 | -0.0900406939 |

**Phenol 11 - E+ZPE=-613.706275 - 1st freq. = 49.0448**

|   |               |               |               |
|---|---------------|---------------|---------------|
| C | -1.1945454355 | -0.2882757813 | 0.0358246985  |
| C | 0.2099361631  | -0.3214053846 | 0.0091815503  |
| C | 0.8824153202  | 0.8835293464  | -0.0128425002 |
| C | 0.1873529599  | 2.104621223   | -0.0087736385 |
| C | -1.2156088133 | 2.1085889623  | 0.0180899396  |
| C | -1.9188067344 | 0.8891971798  | 0.0407735093  |
| H | -1.7396495134 | -1.2286381935 | 0.0533712647  |
| H | 1.9650766815  | 0.907017658   | -0.0337504461 |
| C | 0.9036373083  | 3.3907853189  | -0.0322945977 |
| O | 0.3578812718  | 4.480251762   | -0.0301117864 |
| O | 2.2320252616  | 3.2718637428  | -0.0568894486 |
| C | 2.9621967088  | 4.5008587516  | -0.0803191129 |
| H | 2.7369458801  | 5.0905095872  | 0.8081118434  |
| H | 4.0105432073  | 4.2164251389  | -0.0985530154 |
| H | 2.7024194641  | 5.0771686868  | -0.9680757016 |
| C | -3.4203988793 | 0.9209612498  | 0.0693448537  |
| H | -3.7785219005 | 1.4601910158  | 0.9491736864  |
| H | -3.8121080591 | 1.4480824679  | -0.803458895  |
| H | -3.8273777811 | -0.0901116099 | 0.0841819376  |
| C | 0.9397011021  | -1.6397848482 | 0.005241232   |
| H | 2.0195023658  | -1.4889758358 | -0.0165492545 |
| H | 0.6981622257  | -2.2248451245 | 0.8960513236  |
| H | 0.6644635504  | -2.2381982495 | -0.8667301004 |
| O | -1.9555088931 | 3.2302363708  | 0.0237817698  |
| H | -1.353278841  | 3.9966873654  | 0.0063160483  |

**Phenol 12a - E+ZPE=-613.695393 - 1st freq. = 35.1247**

|   |               |               |               |
|---|---------------|---------------|---------------|
| C | -1.2509311821 | -0.3073972983 | -0.0566158077 |
| C | 0.1459487359  | -0.2817926822 | -0.1229657982 |
| C | 0.82827932    | 0.9207074781  | -0.1090029581 |
| C | 0.1350604333  | 2.1342450064  | -0.0283034997 |
| C | -1.2665254722 | 2.1466366094  | 0.0397716781  |
| C | -1.916506844  | 0.9087747096  | 0.0228577509  |
| H | 1.9107194392  | 0.9330690295  | -0.1607171017 |
| C | 0.9107713477  | 3.4056330686  | -0.0162320344 |
| O | 0.4428075049  | 4.513534961   | 0.0494219285  |
| O | 2.2403553314  | 3.1974422925  | -0.0884805704 |
| C | 3.0403904758  | 4.3787763721  | -0.0810808884 |
| H | 2.8768780845  | 4.9424486505  | 0.8376736562  |
| H | 4.0704759941  | 4.0377503303  | -0.1437738061 |
| H | 2.7918183336  | 5.0111370312  | -0.9336709467 |

|   |               |               |               |
|---|---------------|---------------|---------------|
| C | -1.9702964637 | -1.6247503383 | -0.0732443153 |
| H | -3.0487186486 | -1.4787895861 | -0.0157980618 |
| H | -1.7355021986 | -2.1795973042 | -0.9845687268 |
| H | -1.6514606706 | -2.2475697462 | 0.7657669841  |
| O | 0.7795722382  | -1.4893462945 | -0.2006734921 |
| H | 1.73007529    | -1.3549575571 | -0.2410888226 |
| H | -3.0007689665 | 0.8953370009  | 0.074615263   |
| C | -2.0960020033 | 3.4023739979  | 0.1286194566  |
| H | -1.8411496219 | 3.986842687   | 1.0134626931  |
| H | -1.9250277116 | 4.054659248   | -0.7285836792 |
| H | -3.1537596155 | 3.1400549639  | 0.1693380389  |

**Phenol 12b - E+ZPE=-613.695565 - 1st freq. = 25.0315**

|   |               |               |               |
|---|---------------|---------------|---------------|
| C | -1.1918864685 | -0.3055623203 | 0.0630536348  |
| C | 0.2063958343  | -0.2927170176 | 0.0363172375  |
| C | 0.818695683   | 0.9471184478  | 0.0120685076  |
| C | 0.1030055614  | 2.1517029368  | 0.0134538431  |
| C | -1.3028335801 | 2.1279025729  | 0.0404226399  |
| C | -1.9211381422 | 0.8774132374  | 0.0648890272  |
| C | 0.9499187016  | 3.3769340884  | -0.0150818613 |
| O | 2.1551801976  | 3.3647277362  | -0.0380871772 |
| O | 0.2512736674  | 4.5252507069  | -0.0131607449 |
| C | 1.0392857204  | 5.715706722   | -0.0402192551 |
| H | 1.6545515218  | 5.7429567113  | -0.9396480532 |
| H | 0.3289422509  | 6.5385455219  | -0.0349100862 |
| H | 1.688483696   | 5.7608117393  | 0.8342957482  |
| H | -3.0062008375 | 0.8264505983  | 0.0860284552  |
| C | -2.1916240357 | 3.3477291008  | 0.0448991439  |
| H | -1.991857026  | 3.9802062062  | 0.9101052161  |
| H | -2.0250230399 | 3.9624725351  | -0.8398869732 |
| H | -3.2378032824 | 3.0414181073  | 0.0678263093  |
| C | 0.9712071449  | -1.5856889716 | 0.034921337   |
| H | 0.7369788798  | -2.1764463988 | 0.9234430435  |
| H | 0.7033668408  | -2.1944326497 | -0.8316893314 |
| H | 2.0439779663  | -1.3953867919 | 0.0124379633  |
| O | -1.7913100429 | -1.5255069072 | 0.0868442878  |
| H | -2.7467270724 | -1.4218349809 | 0.103916757   |
| H | 1.9008768213  | 1.0079283993  | -0.0091413488 |

**Phenol 13 - E+ZPE=-613.692829 - 1st freq. = -14.3238**

|   |               |               |               |
|---|---------------|---------------|---------------|
| C | -2.4230298151 | 0.424121799   | -0.0065398597 |
| C | -1.5604484988 | 1.5185481119  | 0.0258276609  |
| C | -0.1962174177 | 1.2724332902  | 0.0330684588  |
| C | 0.2996064973  | -0.0366075651 | 0.0170625505  |
| C | -0.5558286925 | -1.1468708135 | -0.022532165  |
| C | -1.9331010392 | -0.8746118525 | -0.0319197213 |
| H | -3.4985202406 | 0.5870054301  | -0.0127188579 |
| H | 0.5023170296  | 2.0980769801  | 0.0566851237  |
| C | 1.7791915414  | -0.2398396914 | 0.0695276677  |
| O | 2.3372220635  | -1.2784817169 | 0.3129714969  |
| O | 2.4593851003  | 0.8944574914  | -0.1781600828 |
| C | 3.879723758   | 0.7757804375  | -0.114390829  |
| H | 4.2335184972  | 0.0534169034  | -0.8503599759 |
| H | 4.2681794933  | 1.767093783   | -0.3324323516 |
| H | 4.1896427587  | 0.449924636   | 0.878867058   |

|   |               |               |               |
|---|---------------|---------------|---------------|
| C | -2.110498733  | 2.9205437693  | 0.0560442747  |
| H | -2.7003378815 | 3.088671017   | 0.9604336088  |
| H | -1.3057541671 | 3.6555775416  | 0.0353990969  |
| H | -2.7609699462 | 3.1040629423  | -0.802306323  |
| O | -2.7819457552 | -1.9441944784 | -0.0653731938 |
| H | -3.6898632342 | -1.6326014824 | -0.0952899534 |
| C | -0.0914107922 | -2.579652164  | -0.0665018416 |
| H | 0.6872821597  | -2.7156913115 | -0.816151045  |
| H | 0.3452589034  | -2.8734452271 | 0.8896364013  |
| H | -0.9292590289 | -3.2355219201 | -0.2898076581 |

**Phenol 14 - E+ZPE=-613.688077 - 1st freq. = 45.0190**

|   |               |               |               |
|---|---------------|---------------|---------------|
| C | -1.2287803239 | -0.2660644239 | -0.3287363742 |
| C | 0.1498156367  | -0.3304388313 | -0.1746310814 |
| C | 0.9011569395  | 0.8246738472  | 0.0643480774  |
| C | 0.218998788   | 2.0483964573  | 0.1186139717  |
| C | -1.172904376  | 2.137733426   | -0.0167602474 |
| C | -1.8755801001 | 0.9559876168  | -0.2460836717 |
| C | 0.9803922248  | 3.3194165834  | 0.3293567257  |
| O | 0.7237402019  | 4.1525608134  | 1.1572189277  |
| O | 1.9900457528  | 3.4537777576  | -0.5479424257 |
| C | 2.7671248349  | 4.644728754   | -0.4052836205 |
| H | 3.2245225365  | 4.683443129   | 0.5841338644  |
| H | 3.527727623   | 4.5951346957  | -1.1797226855 |
| H | 2.138414758   | 5.5251631394  | -0.5384158465 |
| O | 0.7202812865  | -1.5672521552 | -0.2602852697 |
| H | 1.6775183022  | -1.4931047026 | -0.2678147304 |
| H | -2.9521517485 | 0.9970882087  | -0.3681230311 |
| C | 2.3874291603  | 0.6961282054  | 0.2950851233  |
| H | 2.9341941517  | 0.5777890726  | -0.6457809173 |
| H | 2.7967522404  | 1.5699098938  | 0.7964950358  |
| H | 2.6033418851  | -0.1648970797 | 0.9349465755  |
| H | -1.772955438  | -1.1842876909 | -0.5124380677 |
| C | -1.9089577969 | 3.4521642178  | 0.0662107858  |
| H | -1.8932906785 | 3.8466782937  | 1.0832438248  |
| H | -1.456331416  | 4.2102440321  | -0.5767503347 |
| H | -2.9459051946 | 3.3188462695  | -0.2430589583 |

**Meta Diels-Alder adduct - E+ZPE = -574.324254 - 1st freq. = 56.8673**

|   |               |               |               |
|---|---------------|---------------|---------------|
| C | -0.3534167896 | -1.5083304314 | -0.3165271454 |
| C | -1.8886645906 | -1.3105268648 | -0.3795552774 |
| C | 0.1432395537  | -0.2852717307 | -0.1608176444 |
| C | -2.3174834752 | -0.8750167567 | 1.0466658122  |
| C | -1.8259022652 | 0.3458679508  | 1.2047983232  |
| O | -1.9321329942 | -0.0405300492 | -1.0424093504 |
| H | 0.1685891509  | -2.4548563237 | -0.3359979167 |
| H | -2.8638516272 | -1.497048151  | 1.7411930186  |
| H | -1.8594052635 | 1.0004689582  | 2.062749298   |
| C | 1.5194959542  | 0.1683336033  | 0.0686460904  |
| O | 1.809996761   | 1.2986427541  | 0.3706919471  |
| O | 2.4206240181  | -0.8130331095 | -0.0853911036 |
| C | 3.7791546879  | -0.4296320355 | 0.1326841205  |
| H | 4.0672968631  | 0.3564558852  | -0.5656374533 |
| H | 4.3687924287  | -1.3267799979 | -0.0349748363 |
| H | 3.911631486   | -0.0660924491 | 1.1519913362  |

C -1.0866858082 0.6450427021 -0.1193002854  
H -0.9243605787 1.6825260178 -0.3917437185  
C -2.7114849623 -2.3568509228 -1.0817411526  
H -2.6473215187 -3.3068917197 -0.5471972061  
H -3.7557740903 -2.0441986231 -1.1189990324  
H -2.3488148099 -2.5001026564 -2.1005119136

**Ortho Diels-Alder adduct - E+ZPE = -574.324318 - 1st freq. = 49.5920**

C -0.3581307537 -1.4656145707 -0.3243526405  
C -1.8858118414 -1.2669557915 -0.3737353259  
C 0.131332049 -0.2381358153 -0.1717233294  
C -1.1041233324 0.7023164088 -0.1324738714  
C -2.3232709 -0.8417064416 1.0499758315  
C -1.8336672348 0.3808914414 1.1980103066  
O -1.949412053 -0.0130769007 -1.0456968622  
H -2.4745925535 -2.0281243228 -0.8763523696  
C -0.9378629467 2.1454533281 -0.5230952061  
H 0.1735798384 -2.4060008386 -0.3320488184  
H -2.862951474 -1.4615575423 1.7502376529  
H -1.8646056477 1.0406959517 2.053171065  
C 1.5151800717 0.1752862914 0.0948999097  
O 1.8318356429 1.2612157758 0.5127447546  
O 2.3989903701 -0.8016813712 -0.1608375889  
C 3.7628598187 -0.4720811752 0.1057728742  
H 4.0724661352 0.3789363564 -0.5012148284  
H 4.3358440671 -1.3577003681 -0.1551255402  
H 3.8945082774 -0.2243134001 1.159342457  
H -0.4684407056 2.2159860932 -1.5053942841  
H -0.3052813737 2.6590825562 0.2001633075  
H -1.9179164541 2.6231873351 -0.5628134939

**Methylpropiolate - E+ZPE = -305.097303 - 1st freq.=135.5147**

C -1.9207742127 0.6211931969 -0.000011004  
O -0.7345097822 0.4473311638 0.0000034807  
O -2.5148713917 1.8158499947 -0.0000191046  
C -2.9017883137 -0.4539837693 0.0000646215  
C -3.6722041568 -1.3713070619 0.0001246813  
H -4.357809392 -2.1860728159 0.0001700104  
C -1.621472884 2.9341441226 -0.0000523298  
H -2.2575985069 3.814464493 -0.0000629742  
H -0.990407134 2.9114097675 0.8885544807  
H -0.9904273161 2.9113727887 -0.888672402

**Methylfurane- E+ZPE = -269.202049 - 1st freq.=139.3938**

C -2.6435640895 -0.1007771687 0.0001469493  
C -1.2906207325 -0.1056475885 -0.0001565607  
C -0.8933305675 1.2745691197 0.0000900755  
C -2.0381168023 2.0037632465 -0.0000942144  
O -3.1118766624 1.1723649214 -0.000403253  
H -3.3881134115 -0.8783508281 0.0002590659  
H -0.6533893751 -0.974668909 -0.0002016877  
H 0.1094869461 1.6700794828 0.000223124  
C -2.3251730227 3.4612075351 -0.0001784004  
H -2.9007193727 3.7452793889 -0.884083035  
H -2.9010938101 3.7453036005 0.8834739873

H -1.3895001496 4.0191278794 0.0000138891

**Dimethyl acetylene dicarboxylate - E+ZPE = -532.905751 - 1st freq.=24.7113**

|   |                 |                 |                 |
|---|-----------------|-----------------|-----------------|
| C | 1.779058957596  | 0.478878688624  | 0.083319413023  |
| C | 2.977967606390  | 0.515136107315  | 0.063346397714  |
| C | 0.322710146687  | 0.504354552558  | 0.117596333032  |
| O | -0.318111159373 | 1.483378019772  | 0.373526906897  |
| O | -0.182970198211 | -0.692425848945 | -0.171298170367 |
| C | 4.434303793866  | 0.532511101141  | 0.102525909902  |
| O | 5.076109572895  | 0.235934442625  | 1.069586054900  |
| O | 4.938710635787  | 0.918196379653  | -1.067415849855 |
| C | 6.369878823872  | 0.967546110010  | -1.122654033732 |
| H | 6.785953244494  | -0.021307443995 | -0.930785976189 |
| H | 6.609005143919  | 1.300477414232  | -2.128100084019 |
| H | 6.748886253000  | 1.669413561783  | -0.380146912650 |
| C | -1.614209644565 | -0.763434954567 | -0.160400362572 |
| H | -1.854506226665 | -1.792645797704 | -0.409584605423 |
| H | -1.994031602868 | -0.503598679990 | 0.827486932985  |
| H | -2.028433046822 | -0.077391332513 | -0.898990643647 |

**Diels Alder adduct between methylfurane and DEAD - E+ZPE=-802.138685 - 1st freq.=32.0518**

|   |               |               |               |
|---|---------------|---------------|---------------|
| C | -0.2940862405 | -1.5296174821 | -0.4260130466 |
| C | -1.812787603  | -1.2807679194 | -0.556027797  |
| C | 0.2242354453  | -0.3304851936 | -0.1707466266 |
| C | -0.998693424  | 0.6380910243  | -0.1330790893 |
| C | -2.3188560176 | -0.9455739919 | 0.8645880223  |
| C | -1.7978894143 | 0.2434829025  | 1.1333533025  |
| O | -1.7972314237 | 0.0179638433  | -1.1410767591 |
| H | -2.3683459146 | -2.0018400498 | -1.1461670782 |
| C | -0.7465301537 | 2.0971574562  | -0.3959268531 |
| H | -2.9133182449 | -1.5988975115 | 1.4852521558  |
| H | -1.8402240026 | 0.8366404752  | 2.0351323945  |
| C | 1.5767691894  | 0.1097247984  | 0.2353036814  |
| O | 1.7637710498  | 0.7506606831  | 1.2380871186  |
| O | 2.5278633861  | -0.2256658671 | -0.6316005579 |
| C | 3.8545361029  | 0.1521250913  | -0.2549351633 |
| H | 3.9208030334  | 1.2333613229  | -0.1330451171 |
| H | 4.4956460737  | -0.18466132   | -1.0646069701 |
| H | 4.1287401935  | -0.3315194979 | 0.6829691472  |
| H | -0.2448260233 | 2.2251928299  | -1.3566098422 |
| H | -0.1187234207 | 2.5123388463  | 0.3940081719  |
| H | -1.6957084274 | 2.6336802012  | -0.4194951161 |
| C | 0.2813430817  | -2.885390227  | -0.4124598318 |
| O | -0.3537979307 | -3.869922435  | -0.6936297735 |
| O | 1.5610012052  | -2.9094542452 | -0.0283005324 |
| C | 2.1671357554  | -4.203488058  | -0.0084150934 |
| H | 1.6428220802  | -4.8557759629 | 0.6901528473  |
| H | 2.13914978    | -4.6483205914 | -1.003219473  |
| H | 3.1927897045  | -4.0423973219 | 0.3119765392  |

## 5. NMR spectra

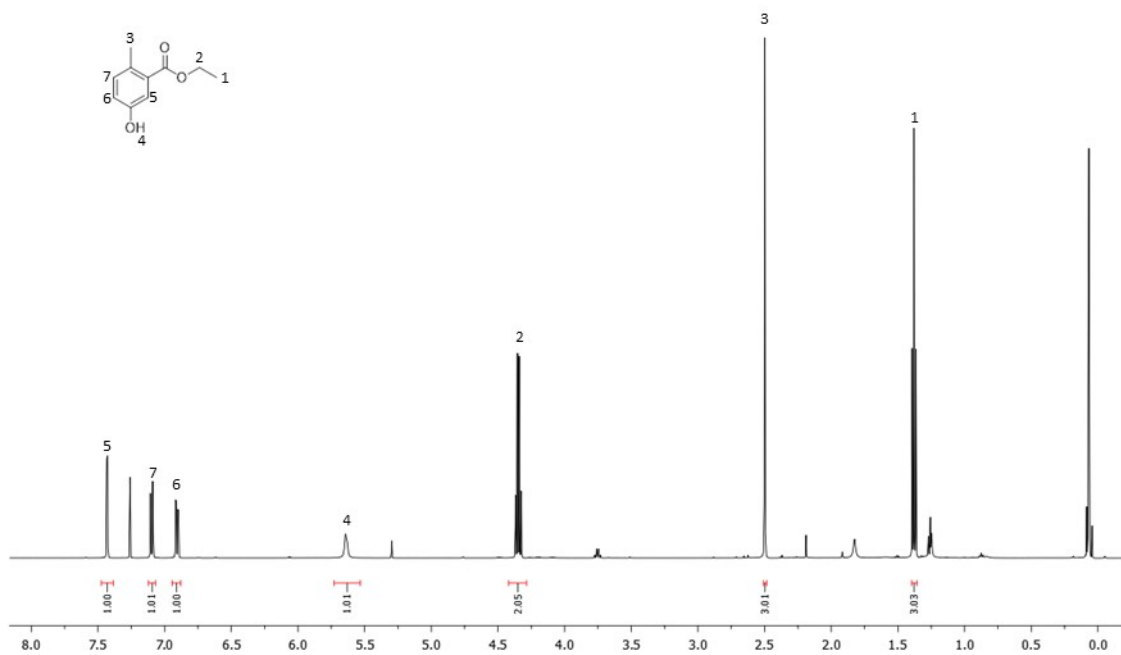

Figure S36 <sup>1</sup>H NMR of 1-o



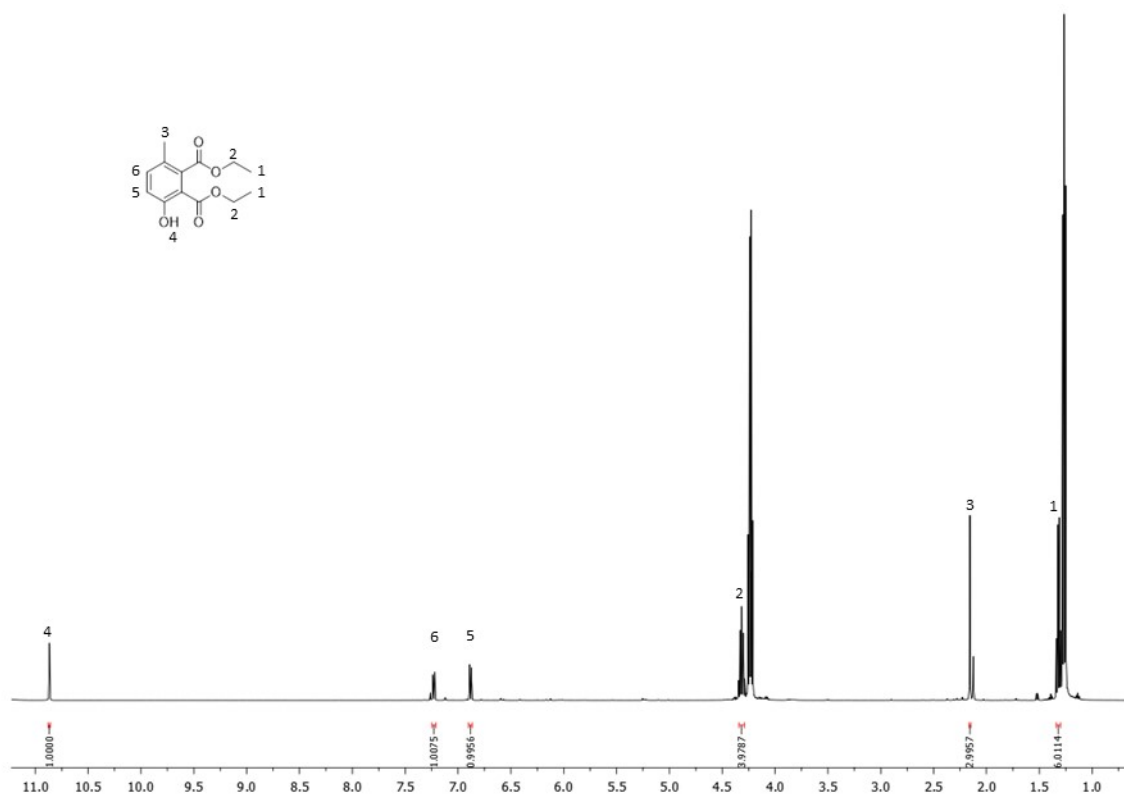

Figure S37 <sup>1</sup>H NMR of 3

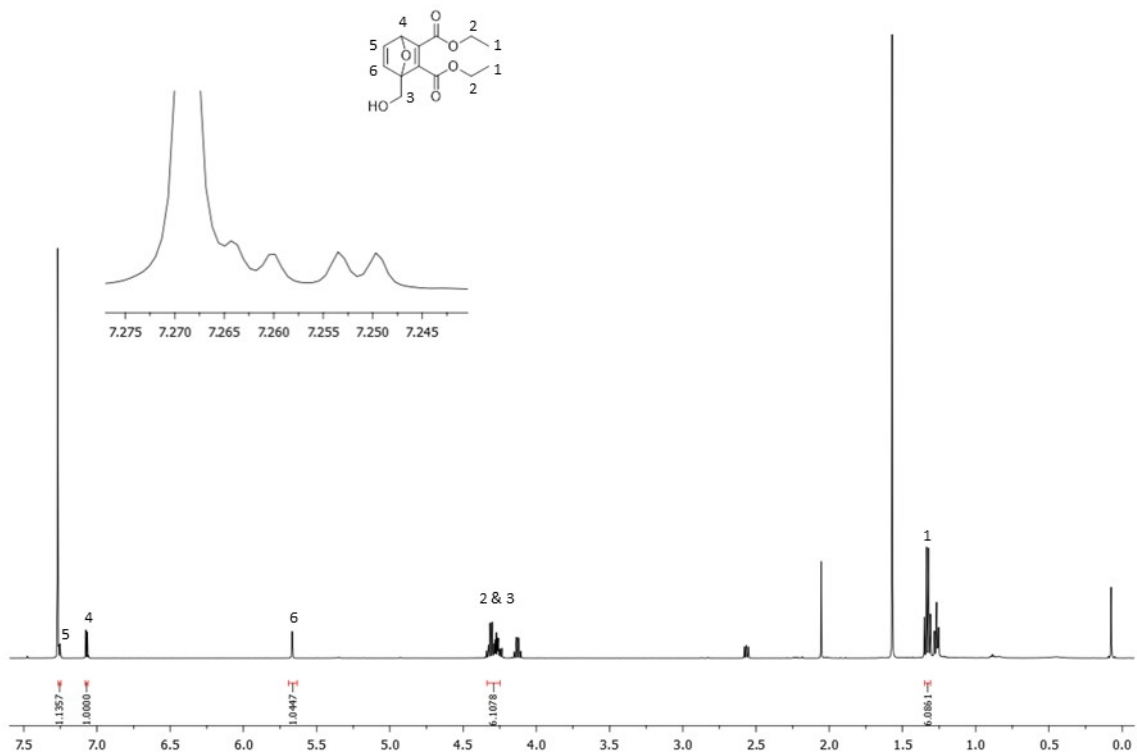

Figure S38 <sup>1</sup>H NMR of 4

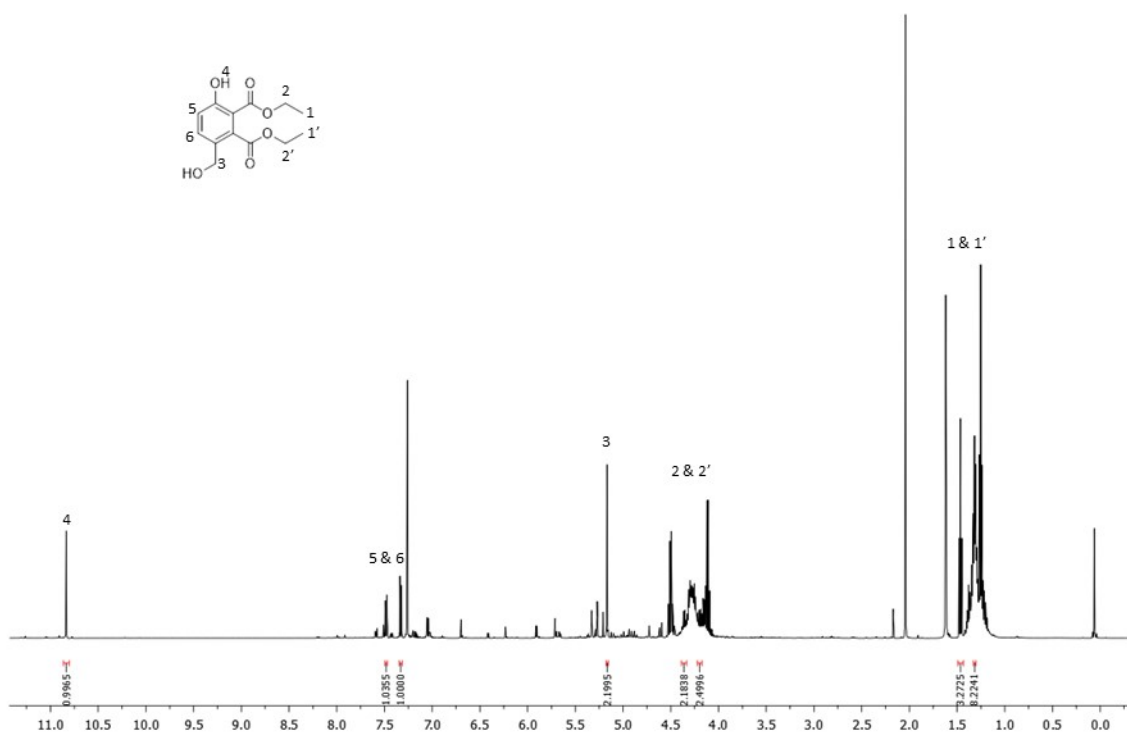

Figure S39 <sup>1</sup>H NMR of 5

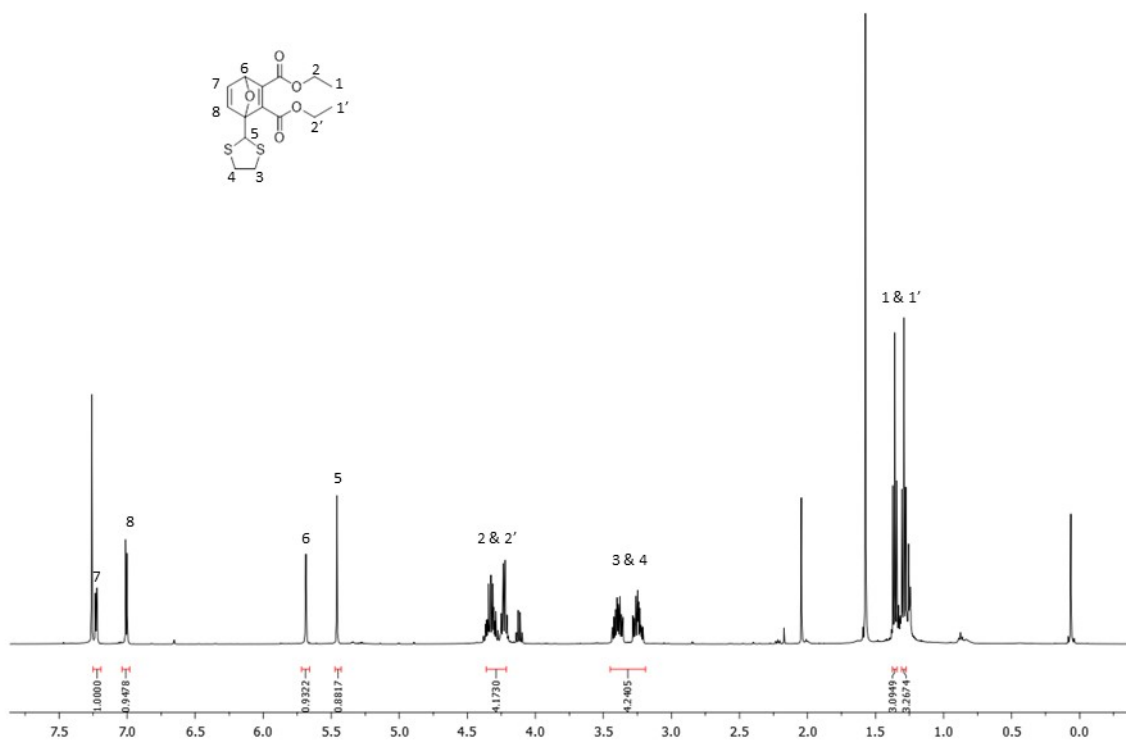

Figure S40 <sup>1</sup>H NMR of 7

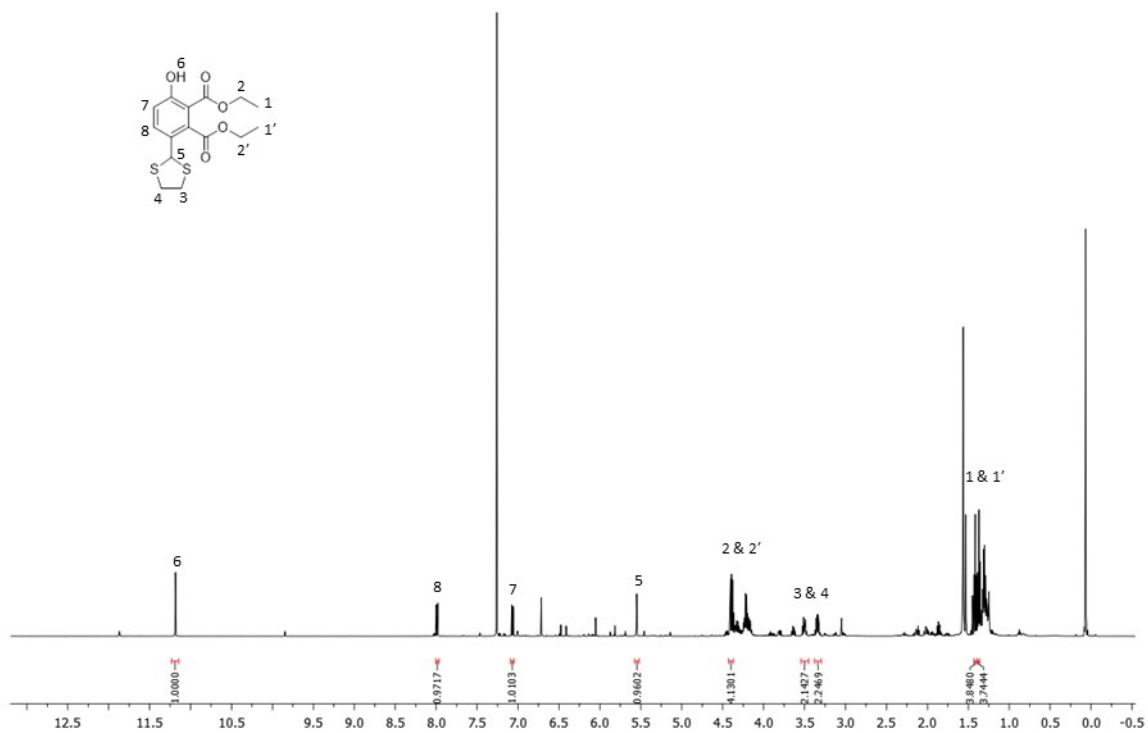

Figure 21 Figure S41 <sup>1</sup>H NMR of **8**

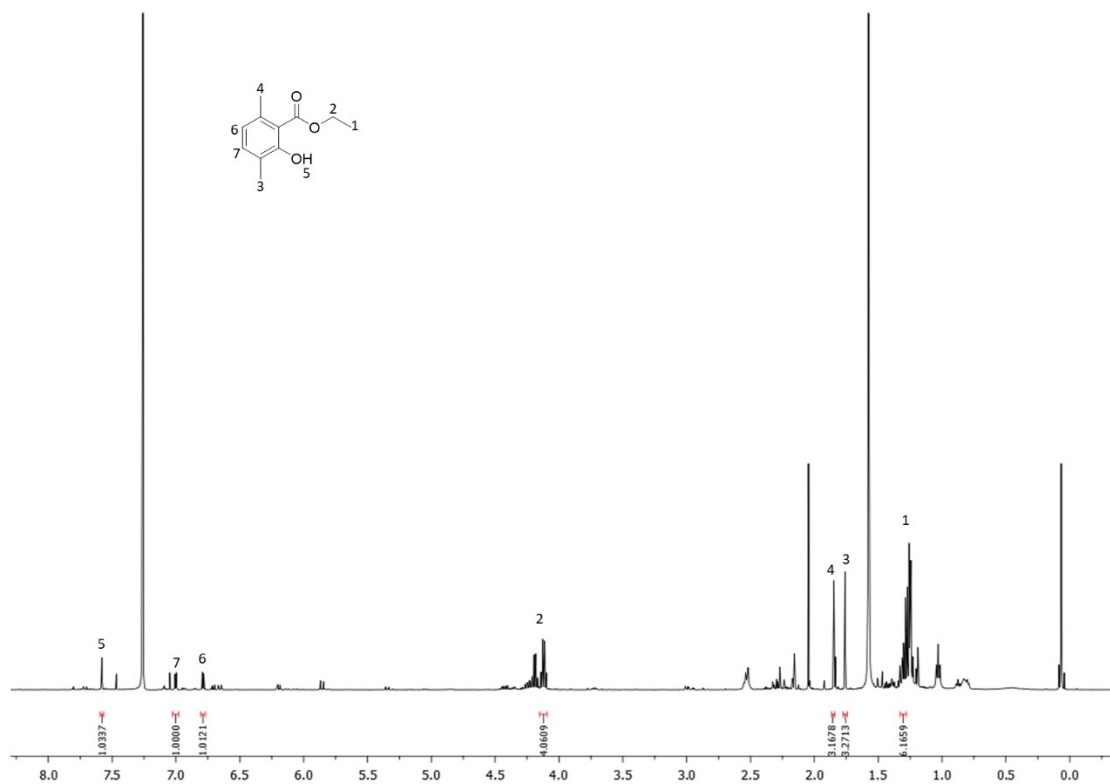

Figure S42 <sup>1</sup>H NMR of 10

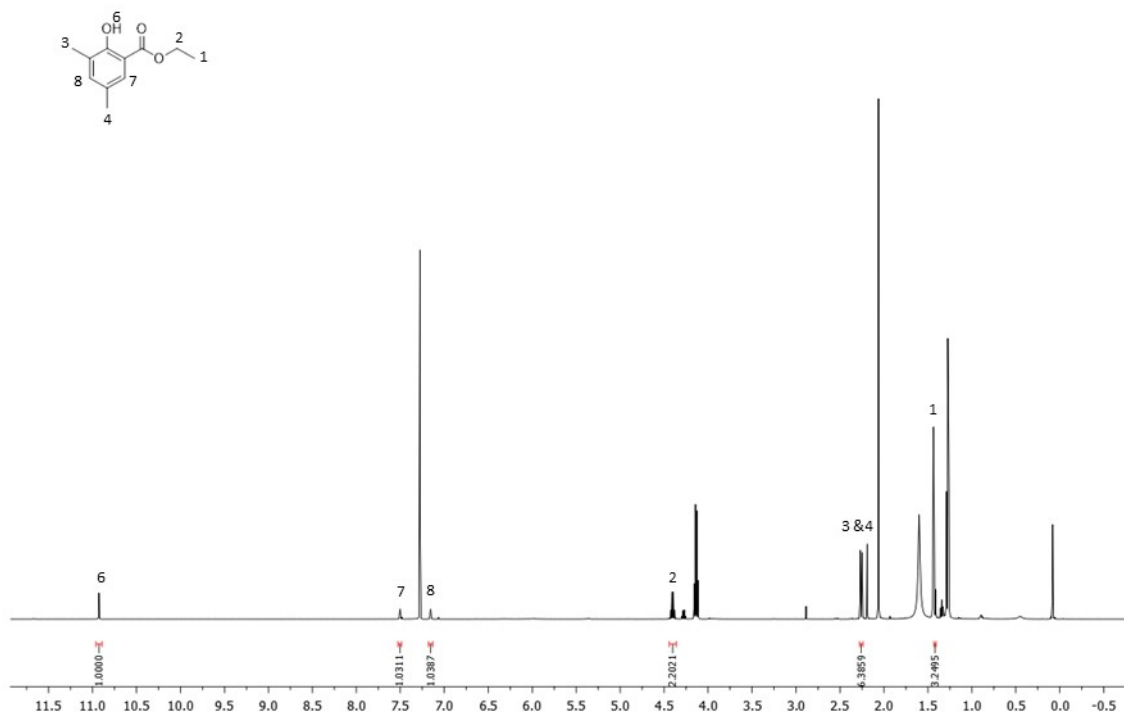

**Figure S43** <sup>1</sup>H NMR of 11

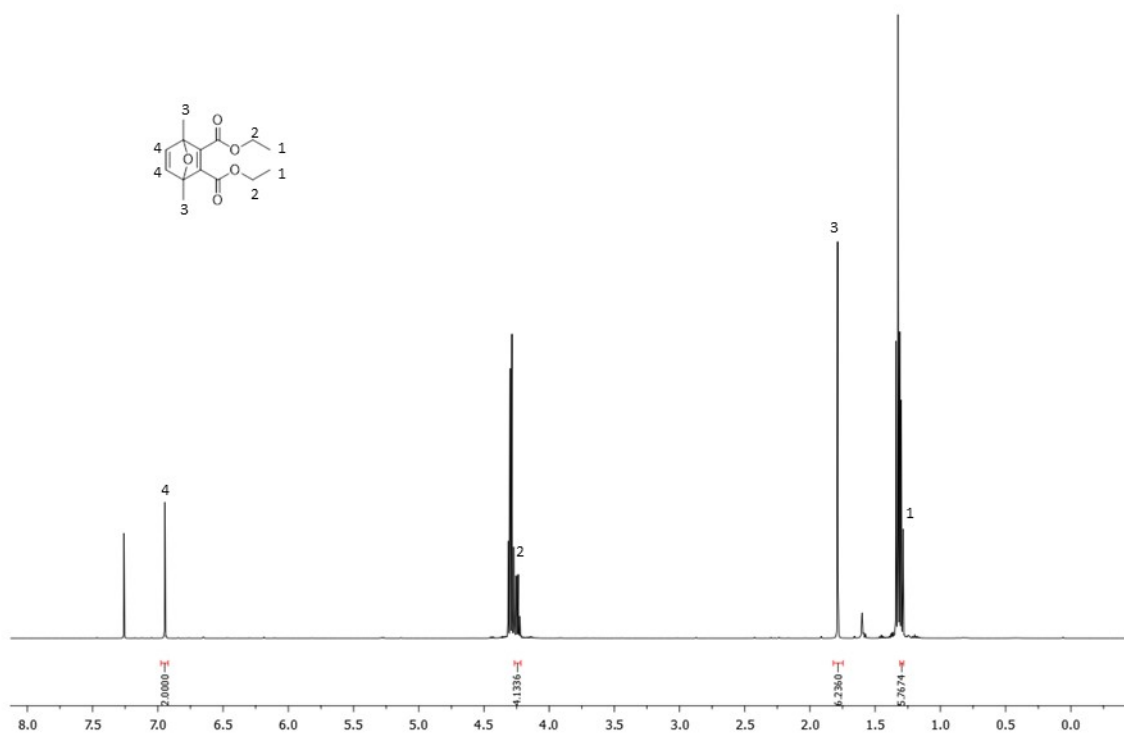

Figure S44 <sup>1</sup>H NMR of 15



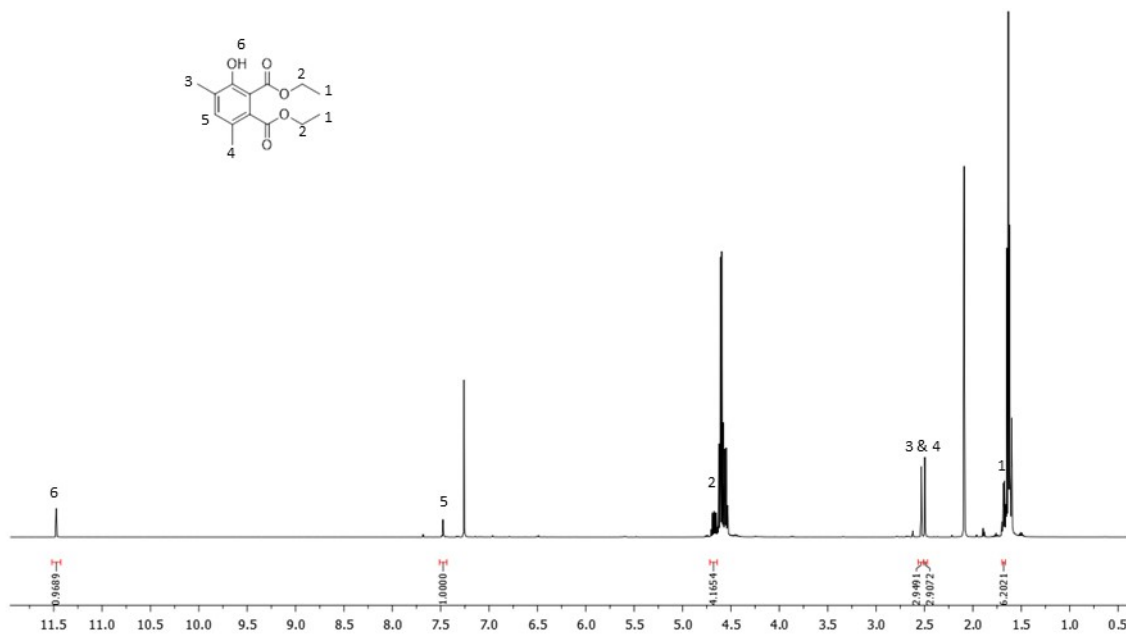

**Figure S45**  $^1\text{H}$  NMR of 16

## References

- 1 W. L. F. Armarego, C. L. L. Chai, Purification of Laboratory Chemicals; Sixth edition, Butterworth-Heinemann imprint, 2012, ISBN: 9780123821621.
- 2 I. Scodeller, K. De Oliveira Vigier, E. Muller, C. Ma, F. Guégan, R. Wischert, F. Jérôme, *ChemSusChem* 2021, **14**, 313.
